# Supplementary material for: PpCRN7 and PpCRN20 of Phythophthora parasitica regulate plant cell death leading to enhancement of host susceptibility
Source: BMC Plant Biol. 2019 Dec 6;19:544. doi: 10.1186/s12870-019-2129-8 (PMC6896422; doi:10.1186/s12870-019-2129-8)
Supplement: Supplementary file 1 — Additional file 1. Sequences and additional information of the Crinkler candidates .xls (1,8 MB). [file 12870_2019_2129_MOESM1_ESM.xls]

## Sheet: Crinkler candidates_IAC
		Signal peptide		Homologues in other P. parasitica genomes								Host localization			Blast2GO Annotation
Name	ID in the Genome Assembly	SignalP	Predisi	INRA-310	P1569	P1976	CJ01A1	P10297	CJ02B3	CJ05E6	CHvianca01	Chloroplast	Mitochondria	Nucleus	Blast description	InterProScan Domains
PpCRN1	L914_17457T0	No	No	ETN01877.1	ETI35520.1	ETO64217.1	-	ETP33481.1	-	ETL29206.1	-	-	-	Y (KKRP)	crinkler family	G3DSA:1.10.150.320 (GENE3D); SSF81585 (SUPERFAMILY)
PpCRN2	L914_09221T1	No	Yes	ETN08188.1 / ETN08187.1	ETI46003.1 / ETI46002.1	ETO74700.1 / ETO74699.1	ETP15845.1 / ETP15844.1	ETP43886.1 / ETP43885.1	ETK85974.1 / ETK85973.1	ETL39399.1 / ETL39398.1	ETL92521.1 / ETL92520.1	-	Y (0.977 | 49-69)	-	---NA---
PpCRN3	L914_08964T0	No	No	ETN08441.1	ETI46335.1	ETO74983.1	ETP16142.1	ETP44167.1	ETK86269.1	ETL39693.1	ETL92812.1	-	-	Y (KKWK,KPRK)	---NA---
PpCRN4	L914_01646T0	No	No	-	-	-	-	-	-	-	-	-	-	-	crinkler family
PpCRN5	L914_20293T0	Yes (1-16)	Yes	-	ETI34717.1	ETO60711.1	ETP01797.1	ETP29938.1	ETK72306.1	ETL25761.1	ETL78966.1	-	-	Y (KKPR)	crinkler family protein
PpCRN6	L914_21578T0	No	No	-	ETI36570.1	-	-	-	-	-	-	-	-	-	crinkler family protein
PpCRN7	L914_21747T0	Yes (1-17)	Yes	ETN14590.1	ETI54204.1	ETO82951.1	ETP24026.1	ETP28014.1	ETK94084.1	ETL47474.1	ETM00567.1	-	-	-	crinkler family protein	G3DSA:3.10.20.90 (GENE3D); PTHR24362 (PANTHER); PTHR24362:SF272 (PANTHER); NON_CYTOPLASMIC_DOMAIN (PHOBIUS); SIGNAL_PEPTIDE (PHOBIUS); SIGNAL_PEPTIDE_H_REGION (PHOBIUS); SIGNAL_PEPTIDE_N_REGION (PHOBIUS); SIGNAL_PEPTIDE_C_REGION (PHOBIUS); SignalP-noTM (SIGNALP_EUK); SignalP-TM (SIGNALP_GRAM_POSITIVE)
PpCRN8	L914_05833T0	No	No	ETN22122.1	ETI50470.1	ETO79212.1	ETP20230.1	ETP48173.1	ETK90343.1	ETL43754.1	ETL96889.1	-	-	-	crinkler family
PpCRN9	L914_14040T0	No	No	ETN04354.1	ETI39826.1	ETO68552.1	ETP09672.1	ETP37842.1	ETK79965.1	ETL33383.1	ETL86659.1	-	-	Y (LGEV,RQRNGGRR)	crinkler family protein
PpCRN10	L914_14233T0	No	Yes	ETN04239.1	ETI39628.1	ETO68352.1	ETP09509.1	ETP37568.1	ETK79800.1	ETL33218.1	ETL86479.1	-	-	Y (KVKK,KKRKR)	crinkler family protein	PTHR24362:SF272 (PANTHER); PTHR24362 (PANTHER)
PpCRN11	L914_17450T0	No	No	ETN01873.1	ETI35533.1	ETO64269.1	ETP05353.1	ETP33491.1	ETK75774.1	ETL29212.1	ETL82431.1	-	-	-	crinkler family protein
PpCRN12	L914_09004T0	No	No	ETN08491.1	ETI46269.1	ETO74939.1	ETP16075.1	-	ETK86207.1 / ETK86205.1	ETL39628.1	ETL92751.1	-	-	-	hypothetical protein PPTG_12264
PpCRN13	L914_15165T0	No	No	ETN19499.1	ETI38557.1	ETO67331.1	ETP08438.1	ETP36510.1	ETK78747.1	ETL32182.1	ETL85420.1	-	-	-	crinkler family protein
PpCRN14	L914_11340T0	Yes (1-15)	Yes	-	ETI43189.1	ETO71847.1	ETP12954.1	ETP41055.1	ETK83251.1	ETL36642.1	ETL89852.1	-	-	Y (KRKRDWNELNKVLEKKRGR,RKRDWNELNKVLEKKRGRD,AKAKLRKVEEERRKQEEEQRRIENMPAKRKRDW)	crinkler family protein
PpCRN15	L914_07028T0	No	No	ETN10736.1	ETI48770.1	ETO77497.1	ETP18531.1	ETP46444.1	ETK88661.1	ETL42052.1	ETL95208.1	-	-	-	crinkler family protein
PpCRN16	L914_14234T0	No	No	ETN04240.1	ETI39628.1	ETO68352.1	ETP09509.1	ETP37568.1	ETK79800.1	ETL33218.1	ETL86479.1	-	-	-	crinkler family protein	PTHR24362:SF272 (PANTHER); PTHR24362 (PANTHER)
PpCRN17	L914_14210T0	No	No	ETN04195.1	-	ETO68383.1	-	ETP37592.1	ETK79815.1	-	ETL86489.1	-	-	-	crinkler family protein
PpCRN18	L914_05351T0	No	No	ETN12068.1	ETI51040.1	ETO79789.1	ETP20823.1	ETP48748.1	ETK90928.1	ETL44328.1	ETL97503.1	-	-	Y (KKWK)	---NA---
PpCRN19	L914_20098T0	No	No	ETN00159.1	ETI32204.1	ETO60941.1	ETP02067.1	ETP30227.1	ETK72569.1	ETL26026.1	ETL79237.1	-	-	-	crinkler family	PTHR33129 (PANTHER); PTHR33129:SF1 (PANTHER)
PpCRN20	L914_17494T0	Yes (1-17)	Yes	ETN01922.1	ETI35479.1	ETO64217.1	ETP05316.1	ETP33441.1	ETK75729.1	ETL29171.1	ETL82391.1	-	-	-	crinkler family protein	G3DSA:3.10.20.90 (GENE3D); PTHR24362 (PANTHER); PTHR24362:SF272 (PANTHER); SIGNAL_PEPTIDE (PHOBIUS); SIGNAL_PEPTIDE_H_REGION (PHOBIUS); NON_CYTOPLASMIC_DOMAIN (PHOBIUS); SIGNAL_PEPTIDE_C_REGION (PHOBIUS); SIGNAL_PEPTIDE_N_REGION (PHOBIUS); SignalP-noTM (SIGNALP_EUK)
PpCRN21	L914_13776T0	No	No	ETN04969.1	ETI53741.1/ETI53742.1	ETO82431.1	ETP23552.1 / ETP23553.1	ETP51559.1 / ETP51560.1	ETK88187.1 / ETK88188.1	ETL33775.1 / ETL33776.1	-	-	-	-	crinkler family protein	PTHR33129 (PANTHER); PTHR33129:SF3 (PANTHER)
PpCRN22	L914_09344T0	No	No	ETN20831.1	ETI45842.1	ETO74532.1	ETP15664.1	ETP43723.1	ETK85810.1	ETL39238.1	ETL92341.1	-	-	Y (KKKR,KKRP)	camk protein kinase	IPR002290 (SMART); IPR000719 (PFAM); G3DSA:3.30.200.20 (GENE3D); G3DSA:1.10.510.10 (GENE3D); PTHR24347:SF198 (PANTHER); IPR020636 (PANTHER); IPR008271 (PROSITE_PATTERNS); IPR000719 (PROSITE_PROFILES); IPR011009 (SUPERFAMILY)
PpCRN23	L914_01226T0	No	No	ETN24951.1	ETI56090.1	ETO84833.1	ETP25903.1	-	-	ETL49284.1	ETM02335.1	-	-	Y (KRQNRNGRKKKQRRN)	crinkler family protein	G3DSA:1.10.510.10 (GENE3D); PTHR33129 (PANTHER); PTHR33129:SF1 (PANTHER); IPR011009 (SUPERFAMILY)
PpCRN24	L914_21748T0	No	No	ETN14589.1	ETI54203.1	ETO82950.1	ETP24025.1	ETP28013.1	ETK94083.1	ETL47473.1	ETM00566.1	-	-	-	crinkler family protein
PpCRN25	L914_03731T0	No	No	-	-	-	-	-	ETK92978.1	ETL46400.1	ETL99534.1	-	-	-	crinkler family protein	PTHR24362 (PANTHER); PTHR24362:SF272 (PANTHER)
PpCRN26	L914_09977T0	No	No	-	-	-	ETP14823.1	-	ETK84984.1	-	-	-	-	-	crinkler family protein	PTHR24362:SF272 (PANTHER); PTHR24362 (PANTHER); CYTOPLASMIC_DOMAIN (PHOBIUS); TRANSMEMBRANE (PHOBIUS); NON_CYTOPLASMIC_DOMAIN (PHOBIUS)
PpCRN27	L914_15750T0	No	No	-	ETI37765.1	ETO58461.1	-	-	-	-	-	-	-	-	crinkler family protein	G3DSA:3.10.20.90 (GENE3D); PTHR24362:SF251 (PANTHER); PTHR24362 (PANTHER)
PpCRN28	L914_13776T2	No	No	ETN04971.1 / ETN04970.1	ETI53743.1 / ETI53742.1	ETO82433.1 / ETO82432.1	ETP23554.1 / ETP23553.1	ETP51561.1 / ETP51560.1	ETK88189.1 / ETK88188.1	ETL33777.1 / ETL33776.1	ETL87056.1	-	-	-	crinkler family	PTHR33129 (PANTHER); PTHR33129:SF3 (PANTHER)
PpCRN29	L914_13776T1	No	No	ETN04970.1 / ETN04971.1	ETI53742.1 / ETI53741.1 / ETI53743.1	ETO82432.1 / ETO82433.1	ETP23553.1 / ETP23552.1 / ETP23554.1	ETP51560.1 / ETP51559.1 / ETP51561.1	ETK88188.1 / ETK88187.1 / ETK88189.1	ETL33776.1 / ETL33775.1 / ETL33777.1	ETL87056.1	-	-	-	crinkler family protein	PTHR33129 (PANTHER); PTHR33129:SF3 (PANTHER)
PpCRN30	L914_02207T0	No	No	ETN14908.1	ETI54952.1	ETO83698.1	ETP24751.1	ETP52731.1	ETK94780.1	ETL48179.1	ETM01277.1	-	-	-	crinkler family	IPR027417 (G3DSA:3.40.50.GENE3D); PTHR33129 (PANTHER); PTHR33129:SF3 (PANTHER); IPR027417 (SUPERFAMILY)
PpCRN31	L914_13553T0	No	No	ETN05158.1	ETI40500.1	ETO69233.1	ETP10276.1	ETP38417.1	ETK80602.1	ETL34025.1	ETL87301.1	-	-	Y (KRKR)	crinkler family protein
PpCRN32	L914_03213T0	No	No	-	ETI30206.1	-	ETP00001.1	-	ETK81185.1	ETL34626.1	-	-	-	Y (KRKL,KRKR)	crinkler family	PTHR33129 (PANTHER); PTHR33129:SF1 (PANTHER); IPR027417 (SUPERFAMILY)
PpCRN33	L914_03656T0	No	No	ETN13963.1	ETI53218.1	ETO81914.1	ETP23005.1	ETP51008.1	ETK93051.1	ETL46476.1	ETL99626.1	-	-	-	crinkler family protein	G3DSA:3.10.20.90 (GENE3D); PTHR24362:SF244 (PANTHER); PTHR24362 (PANTHER); NON_CYTOPLASMIC_DOMAIN (PHOBIUS); SIGNAL_PEPTIDE_H_REGION (PHOBIUS); SIGNAL_PEPTIDE_N_REGION (PHOBIUS); SIGNAL_PEPTIDE (PHOBIUS); SIGNAL_PEPTIDE_C_REGION (PHOBIUS)
PpCRN34	L914_03373T0	No	No	ETN13598.1	ETI53602.1	ETO82270.1	ETP23400.1	ETP51400.1	ETK93465.1	ETL46858.1	ETL99962.1	-	-	-	hypothetical protein PPTG_08358	IPR027417 (G3DSA:3.40.50.GENE3D); IPR027417 (SUPERFAMILY)
PpCRN35	L914_06740T0	No	No	ETN11008.1	ETI49119.1	ETO77843.1	ETP18872.1	ETP46835.1	ETK88993.1	ETL42400.1	ETL95568.1	-	-	Y (KRRFRAAF)	crinkler domain-containing protein
PpCRN36	L914_15124T0	No	No	-	-	ETO67345.1	ETP08481.1	-	-	ETL32241.1	ETL85464.1	-	-	-	crinkler family protein
PpCRN37	L914_18711T0	No	No	ETN17871.1	ETI33903.1	ETO62692.1	ETP03784.1	ETP31921.1	ETK74261.1	ETL27691.1	ETL80934.1	-	-	Y (KKRKR)	---NA---
PpCRN38	L914_04524T0	No	No	-	ETI52060.1	-	ETP21862.1	ETP27716.1	ETK91946.1	-	-	-	-	-	crinkler family protein
PpCRN39	L914_04787T0	No	No	ETN12336.1	ETI51756.1	ETO80476.1	ETP21502.1	ETP49417.1	ETK91611.1	ETL45021.1	ETL98175.1	-	Y (0.998 | 27-61)	-	hypothetical protein PPTG_09194
PpCRN40	L914_04573T0	No	No	-	-	-	-	-	-	-	-	-	-	Y (RPRKRQK)	crinkler family protein
PpCRN41	L914_16066T0	No	No	ETN02752.1	ETI37276.1	ETO66014.1	ETP07100.1	ETP35219.1	ETK77488.1	ETL30923.1	ETL84181.1	-	-	-	crinkler family
PpCRN42	L914_11513T0	No	No	ETN06731.1	ETI43028.1	ETO71637.1	ETP12752.1	-	ETK83032.1	ETL36415.1	ETL89628.1	-	-	-	crinkler family protein
PpCRN43	L914_08178T0	No	No	-	-	ETO76015.1	-	ETP45137.1	-	-	ETL93806.1	-	-	-	crinkler family
PpCRN44	L914_03775T0	No	No	-	-	ETO81768.1	-	ETP50843.1	ETK92920.1	ETL46352.1	ETL99485.1	-	-	-	crinkler family
PpCRN45	L914_07415T0	No	No	ETN10590.1	-	-	ETP00129.1	-	ETK88199.1	-	ETL94768.1	-	-	Y (KRRKRQRRN)	crinkler family protein	G3DSA:1.10.510.10 (GENE3D); IPR000719 (PFAM); PTHR23139 (PANTHER); PTHR23139:SF65 (PANTHER); IPR000719 (PROSITE_PROFILES); IPR011009 (SUPERFAMILY)
PpCRN46	L914_02208T0	No	No	ETN14908.1	ETI54952.1	ETO83698.1	ETP24751.1	ETP52731.1	ETK94780.1	ETL48179.1	ETM01277.1	-	Y (0.992 | 59-84)	-	crinkler family	PTHR33129:SF3 (PANTHER); PTHR33129 (PANTHER)
PpCRN47	L914_17710T0	No	No	ETN01534.1	ETI35218.1	ETO63968.1	ETP05045.1	ETP33202.1	ETK75481.1	ETL28912.1	ETL82153.1	-	-	-	crinkler family protein
PpCRN48	L914_11114T0	No	No	ETM97624.1	-	-	-	-	ETK83529.1	ETL36942.1	ETL90108.1	-	-	-	crn2-like protein
PpCRN49	L914_11514T0	No	No	ETN06732.1	-	-	-	ETP40848.1	ETK83033.1	-	ETL89629.1	-	-	-	crinkler family
PpCRN50	L914_04212T0	No	No	-	-	ETO81256.1	ETP22299.1	ETP50210.1	ETK92356.1	-	-	-	-	Y (RKIKRQNTPWPKLVKK)	crinkler family protein	IPR027417 (SUPERFAMILY)
PpCRN51	L914_03657T0	No	No	-	ETI53219.1	-	ETP23006.1	-	-	ETL46477.1	-	-	Y (0.663 | 55-85)	-	crinkler family protein
PpCRN52	L914_15164T0	No	No	ETN19498.1	ETI38556.1	ETO67330.1	ETP08437.1	ETP36509.1	ETK78746.1	ETL32181.1	ETL85419.1	-	-	-	crinkler family protein
PpCRN53	L914_02588T0	No	No	ETM98678.1	ETI54453.1	-	ETP24291.1	ETP52267.1	ETK94324.1	ETL47690.1	ETM00809.1	-	-	-	crinkler family protein	G3DSA:1.10.510.10 (GENE3D); PTHR23139:SF65 (PANTHER); PTHR23139 (PANTHER); IPR011009 (SUPERFAMILY)
PpCRN54	L914_04867T0	No	No	ETN12432.1	ETI51698.1	ETO80450.1	-	ETP49360.1	-	ETL44934.1	ETL98088.1	-	-	-	crinkler family protein	IPR027417 (G3DSA:3.40.50.GENE3D); IPR027417 (SUPERFAMILY)
PpCRN55	L914_17959T0	No	No	-	-	ETO63676.1	ETP07179.1	-	ETK75204.1	ETL28632.1	ETL81886.1	-	-	-	crinkler family
PpCRN56	L914_03816T0	No	No	ETN13087.1	ETI53052.1	ETO81725.1	ETP22845.1	ETP50821.1	ETK92893.1	ETL46305.1	ETL99448.1	-	-	-	crinkler family protein
PpCRN57	L914_09926T0	No	No	ETN21570.1	ETI45071.1	ETO59223.1	ETP14888.1	ETP42956.1	ETK85046.1	ETL38469.1	ETL91588.1	-	-	-	crinkler family protein
PpCRN58	L914_07145T0	No	No	ETN10865.1	ETI48614.1	ETO77353.1	ETP18383.1	ETP46309.1	ETK88523.1	ETL41919.1	-	-	-	Y (KRQRVEHSTSDKFDVKRQR)	crinkler family	PTHR33129 (PANTHER)
PpCRN59	L914_04868T0	No	No	ETN12433.1	ETI51699.1	ETO80451.1	ETP21483.1	ETP49333.1	ETK91524.1	ETL44935.1	-	-	-	-	crinkler domain-containing
PpCRN60	L914_01407T0	No	No	ETN15372.1	ETI55898.1	ETO84621.1	ETP25675.1	ETP53689.1	ETK95683.1	ETL49067.1	-	-	-	-	crinkler family
PpCRN61	L914_18996T0	No	No	ETN00989.1	ETI33554.1	ETO62359.1	ETP03410.1	-	ETK73918.1	ETL27350.1	ETL80590.1	-	-	-	crinkler family
PpCRN62	L914_11877T0	No	No	ETN06131.1	ETI42557.1	ETO71252.1	ETP12275.1	ETP40427.1	ETK82601.1	ETL35968.1	ETL89209.1	-	-	-	hypothetical protein PPTG_13916	IPR027417 (G3DSA:3.40.50.GENE3D); PTHR33129 (PANTHER); PTHR33129:SF2 (PANTHER); IPR027417 (SUPERFAMILY)
PpCRN63	L914_03640T0	No	No	ETM97746.1	ETI53230.1	ETO81896.1	ETP23019.1	ETP51019.1	ETK93076.1	ETL39786.1	ETL99636.1	-	-	-	crinkler family
PpCRN64	L914_14209T0	No	No	ETN04195.1	ETI39651.1	ETO68383.1	ETP09536.1	ETP37592.1	ETK79816.1	ETL30652.1	ETL86488.1	-	-	Y (KRKRDWDELNDVLKSKRGK,RKRDWDELNDVLKSKRGKD)	hypothetical protein PPTG_14904
PpCRN65	L914_17709T0	No	No	-	ETI35218.1	-	-	-	-	-	-	-	-	-	crinkler family protein
PpCRN66	L914_07626T0	No	No	-	-	ETO76737.1	-	ETP45857.1	-	-	ETL94510.1	-	-	-	crinkler family protein
PpCRN67	L914_04536T0	No	No	-	ETI52060.1	ETO80822.1	ETP21863.1	-	ETK91931.1	ETL45332.1	ETL98504.1	-	-	-	hypothetical protein PPTG_08988	IPR020683 (G3DSA:1.25.40.GENE3D); IPR020683 (SUPERFAMILY)
PpCRN68	L914_06215T0	No	No	-	-	-	-	-	-	-	ETL96413.1	-	-	-	crinkler family protein
PpCRN69	L914_04628T0	No	No	-	ETI51998.1	ETO80741.1	ETP21783.1	ETP51423.1	ETK91824.1	ETL45223.1	ETL98400.1	-	-	-	serine threonine protein kinase	IPR011009 (SUPERFAMILY)
PpCRN70	L914_21749T0	No	No	ETN14589.1	ETI54202.1	ETO82949.1	ETP24024.1	ETP28012.1	ETK94082.1	ETL47472.1	ETM00565.1	-	-	-	crinkler family protein
PpCRN71	L914_15004T1	No	No	-	ETI38708.1	ETO67505.1	ETP08673.1	ETP36713.1	ETK78954.1 / ETK78953.1	ETL32384.1	-	-	-	-	crinkler family	PTHR33129:SF3 (PANTHER); PTHR33129 (PANTHER)
PpCRN72	L914_15004T0	No	No	ETN19278.1	ETI38708.1	ETO67505.1	ETP08673.1	ETP36713.1	ETK78953.1 / ETK78954.1	-	-	-	-	-	crinkler family	PTHR33129 (PANTHER); PTHR33129:SF3 (PANTHER)
PpCRN73	L914_02589T0	No	No	ETM98678.1	ETI54454.1	-	ETP24291.1	ETP52267.1	ETK94324.1	ETL47690.1	ETM00809.1	-	-	-	crinkler family protein	G3DSA:1.10.510.10 (GENE3D); IPR011009 (SUPERFAMILY)
PpCRN74	L914_03776T0	No	No	ETN13046.1	ETI53081.1	-	-	-	-	-	-	-	-	-	crinkler family
PpCRN75	L914_16652T0	No	No	ETN18043.1	-	ETO65338.1	ETP06437.1	ETP34547.1	ETK76843.1	ETL30264.1	ETL83493.1	-	-	-	crinkler family protein	IPR002575 (PFAM); G3DSA:3.90.1200.10 (GENE3D); IPR011009 (SUPERFAMILY)
PpCRN76	L914_04786T0	No	No	ETN12335.1	ETI51755.1	ETO80475.1	-	ETP49416.1	-	-	-	-	-	-	crinkler family
PpCRN77	L914_08184T0	No	No	-	ETI47322.1	-	-	-	-	ETL40645.1 / ETL40679.1	ETL93800.1	-	-	-	---NA---
PpCRN78	L914_02220T0	No	No	ETN14924.1	ETI54933.1	ETO83673.1	ETP24745.1	ETP52718.1	ETK94767.1	ETL48166.1	ETM01260.1	-	-	-	crinkler family protein	G3DSA:1.10.510.10 (GENE3D); PTHR23139:SF65 (PANTHER); PTHR23139 (PANTHER); IPR011009 (SUPERFAMILY)
PpCRN79	L914_20099T0	No	No	ETN00160.1	ETI32205.1	-	ETP02068.1	ETP30228.1	ETK72570.1	ETL26027.1	ETL79238.1	-	-	-	crinkler family
PpCRN80	L914_09884T0	No	No	-	-	ETO73709.1	-	ETP42980.1	-	ETL38497.1	-	-	-	Y (RRLVMVTAMTSRRKVQ)	hypothetical protein PPTG_01677

## Sheet: Motif M1-M22_IAC_01_95.1 
IAC 01/95.1 isolate
Motif	ID	2	p001	20	seq.	sequence
M1	AL	N_A|CRN71	89	144	0.48	KQNGEMDASYRLFNTAFGFPNEEDAEDGDIHVLVDILEYVKKS-LRILRYNRKSQLQ..
M1	AL	N_A|CRN72	89	144	0.48	KQNGEMDASYRLFNTAFGFPNEEDAEDGDIHVLVDILEYVKKS-LRILRYNQQDVSQ..
M1	AL	N_A|CRN26	123	175	0.94	.....MDPPLRLNNARYFGANFKPSE-GEIHVLVVVPKATEELVLPAFEYEDNQREQQS
M1	AL	N_A|CRN49	42	75	1.00	....QMDPSYRVRNTDAYAPDEDAAEDGEIHVLVKVPE.....................
M1	AL	N_A|CRN25	90	121	0.89	.....MNPLLWIKNYQHFGENFRPGE-DQVHVLVVVPE.....................
M1	AL	N_A|CRN10	86	117	0.89	.....MMPSLWLKNAKYFGESFQPGE-GQVHVLVVVPE.....................
M1	AL	N_A|CRN12	1	32	1.00	.....MDPMLFLSNSSHLGQNFKRTE-GNAHVLVAIPE.....................
M1	AL	N_A|CRN21	89	118	0.77	.....MYPWLKLNNDELFGPDFASGEE--IHVLVELP......................
M1	AL	N_A|CRN29	89	118	0.77	.....MYPWLKLNNDELFGPDFASGEE--IHVLVELP......................
M1	AL	N_A|CRN28	89	118	0.77	.....MYPWLKLNNDELFGPDFASGEE--IHVLVELP......................
M1	AL	N_A|CRN58	87	118	1.08	...QKMFSWWKLNKKELFGPGFTPADEEVIHVLVD........................
M1	AL	N_A|CRN23	86	117	1.13	....EMRSSSRLKKKELLGSSFTPGDEE-IQVLVALP......................
M1	AL	N_A|CRN19	62	94	1.13	KQYVNLRPSWKLDDETYFGKNFKPERKEI-HVLV.........................
M1	AL	N_A|CRN50	12	46	1.13	..YLRMRGSWKLSRPELFGLTYRSVRTYVVHVLVVVP......................
M1	AL	N_A|CRN56	66	92	1.21	.........LFLNSTDIFGVSFQANESE-VYVLVVVP......................
M1	AL	N_A|CRN30	38	62	1.24	................YYGEEFQPKRGE-IHVLVVVPPPNKK.................
M1	AL	N_A|CRN32	32	58	1.24	.................FGKDFQPGRKE-IHVLVALPQLSEAELP..............
M1	AL	N_A|CRN36	22	47	1.29	....................NFQPGDRD-IHVLVECPDDPEQVVRAL............
M1	AL	N_A|CRN14	85	117	1.28	.........NPTELLEDVFEKDKLGKRV-IHVLVRVPEELEAE................
M1	AL	N_A|CRN13	37	67	1.28	..............DEFLAKFDAPTLKQ-IHVLVLVPQDDDEQGRA.............
M2	AL	N_A|CRN48	1	33	0.96	LYLATKAG---EWLADNDSA-ALELTEGKAFQDIQTA
M2	AL	N_A|CRN27	181	217	0.82	LFLAKKDEGRGAWVTEADVNNGANDTNGLTPLDVAGA
M2	AL	N_A|CRN20	48	80	0.82	LFLAKRGD---AWLTANEVK-GVSDTSGLTHLDVARA
M2	AL	N_A|CRN7	49	81	0.90	LYLATKGDD--AWMTNDEAD-SVSDV-GLPHLGVPQA
M2	AL	N_A|CRN14	50	69	1.13	LFLARKDD---EWLS-ATDPNVEL.............
M2	AL	N_A|CRN10	55	76	1.06	.YLAKKDG---ARLTEAGAESVVLDE...........
M2	AL	N_A|CRN26	91	111	1.06	LFLAKKDG---MWLDEAGAAAVEL.............
M2	AL	N_A|CRN30	3	30	1.25	.........DNTWLDRSGAEAVTLDENGHPEGFAHMD
M3	AL	N_A|CRN67	434	472	1.15	..FGDVPADSIRFYLAK-RGDEWLSEDSEDIDLLAIGD-GSRV.......
M3	AL	N_A|CRN38	58	90	1.15	....DLDASQIQIHLAK-EEGKWLPLSSDGVKALMVGE............
M3	AL	N_A|CRN34	40	79	1.05	..FAGVDDLMIKLYAAKQNNGRWLDADGPQVVALMAGD-KATV.......
M3	AL	N_A|CRN34	176	217	1.05	.......AIALQLYEARIENGAWLARSAPEVRKLQDGD-SLTIQLLLQQQ
M3	AL	N_A|CRN31	62	105	1.06	EIYGDFNAAQLRVYLAKKDNGEWLTAD--EVNSIENGD-TGPAKGLL...
M3	AL	N_A|CRN6	44	81	1.24	.....VSADELRLWLAN-KGDDLLGSSADDAVAL---NISAQILGIL...
M3	AL	N_A|CRN72	53	88	0.64	..........LKLYVAK-KGDNWLKTSDPSVKRLEDGNVPAQIKDIM...
M3	AL	N_A|CRN71	53	88	0.64	..........LKLYVAK-KGDNWLKTSDPSVKRLEDGNVPAQIKDIM...
M4	AL	N_A|CRN54	23	64	1.02	...................SKCAGRVIMTGNPGIGKSRFLRYCAFQLIKSHSA---VVKSLPPF
M4	AL	N_A|CRN68	12	42	1.02	...................LKSGCNIVVTGNPGIGKSNFYLYYIRELTSS..............
M4	AL	N_A|CRN39	37	71	1.02	........................RILVVGSPGIGKSVFGVFLLLLFMTEQKD---VAYRRL..
M4	AL	N_A|CRN32	123	177	1.02	IRHCYPALWELCLERIHDEKTNTPHLVILGNPGIGKTFFGFVILLLLARAGET---VV......
M4	AL	N_A|CRN31	226	270	0.94	...................SKQDKRVTIVGSAGVGKSCFLVVVGFYLAFIEKRKVLVVRRLNGF
M4	AL	N_A|CRN57	121	153	0.94	........................RIVIVGSPGVGKFCFLMLIAFYLACIKRKKLVV.......
M4	AL	N_A|CRN50	145	171	1.00	........................RVVIVGSPSVGKSCFLMLLPFYRVFRK.............
M4	AL	N_A|CRN62	93	123	1.04	........................RVVIVGSSGTGKTSFLSWVLRYLCRLEKPPV.........
M5	AL	N_A|CRN19	33	61	1.88	.LTLYLARKEGG--V-WLKDDHHVTNFLREDVD
M5	AL	N_A|CRN23	52	77	1.88	.LTLYLARKKGE--TTWMKHDHTVIDFLR....
M5	AL	N_A|CRN58	52	83	0.74	.LTLYMAVKKEGERRKWLSGGKNVDDLLQGDVD
M5	AL	N_A|CRN21	51	83	0.50	KMTLYLARKKQGNEMKWLTGGQNVEDLLRGKVD
M5	AL	N_A|CRN29	51	83	0.50	KMTLYLARKKQGNEMKWLTGGQNVEDLLRGKVD
M5	AL	N_A|CRN28	51	83	0.50	KMTLYLARKKQGNEMKWLTGGQNVEDLLRGKVD
M6	AL	N_A|CRN79	2	55	0.50	.ASLGKSNREGDRHANIQMHFIYSWKKDDYLAAITNQAFYNKVASKLDATSATEV........
M6	AL	N_A|CRN43	62	124	0.50	MATLRKRNMADDALERIEFFRMNSWTQNEYLAAVSNAVFYSKVMDAFDVNNVFDMNDNSDEVQ
M6	AL	N_A|CRN41	60	106	0.88	.SSIGESNKEVLKSNSL-------WSQDEYLAAITNQEFYEKIASKLDTTSSLDL........
M6	AL	N_A|CRN30	237	285	1.20	VASRGKVQEGTDIRTRAMEFDVWSWTLDEYLDAIRNREFFLGVAALLDA..............
M6	AL	N_A|CRN80	148	178	1.93	MTSRRKVQLDDDAHWKVKEHIVSSWSLDEAL................................
M7	AL	N_A|CRN49	86	113	1.17	NIALWYDEDKTLCIHIKFEANDNALRFE
M7	AL	N_A|CRN29	172	198	0.70	NVALWY-EDKTLCIHILFKTEENALRFD
M7	AL	N_A|CRN28	172	198	0.70	NVALWY-EDKTLCIHILFKTEENALRFD
M7	AL	N_A|CRN21	172	193	1.43	NVALWY-EDKTLCIHILFKTGEH.....
M8	AL	N_A|CRN28	119	171	0.67	ASADVAPRQQTGLWLVRGSIANALSIKGVRCRLYRLAGTYLGYYDPARRTGNK
M8	AL	N_A|CRN21	119	171	0.67	ASADVAPRQQTGLWLVRGSIANALSIKGVRCRLYRLAGTYLGYYDPARRTGNK
M8	AL	N_A|CRN29	119	171	0.67	ASADVAPRQQTGLWLVRGSIANALSIKGVRCRLYRLAGTYLGYYDPARRTGNK
M8	AL	N_A|CRN65	40	75	1.99	................KGKVYDAMDTAIVRL-LYRSSAEYNGYYNPKLRSAGR
M9	AL	N_A|CRN41	125	159	1.08	VQLKFYYAGGSCRFLFQYTTNEVKRMLEKGAESAN
M9	AL	N_A|CRN30	299	333	0.58	VESKYHYAGGSCRYMFDCTTTDVKDRLCRAVESAS
M9	AL	N_A|CRN74	24	56	0.58	VESKYRYAGASCRYVFDFTTTDVENRLCRAVDS..
M9	AL	N_A|CRN43	144	168	1.76	........GGSCRFMFQYHKQEVMTALESAVKT..
M10	AL	N_A|CRN47	3	87	1.17	IHIESVSEHPVVQDRFEIKLVIRAICIEHGRLILDRLKEGVEVSADGLEMRTSVYVTNPIGFCACMDWRHAQIAERWEVFLGGSS
M10	AL	N_A|CRN42	42	126	1.17	ICVESVSHHPVINNRYEVKLIVCALDAEYDRLISMRLIEGAIVSTDLLEMRTSVHVENPNVFRTCMEWKYKEIQKSWQDYYSMTS
M10	AL	N_A|CRN21	366	439	0.83	.......EKPSIGSRYKVEIFVKVLDAHCIDRVFSRLKEGSTTIDDPLVMKTFVHVENPETFRLCMQWKHDENDERWRSFL....
M10	AL	N_A|CRN29	346	419	0.83	.......EKPSIGSRYKVEIFVKVLDAHCIDRVFSRLKEGSTTIDDPLVMKTFVHVENPETFRLCMQWKHDENDERWRSFL....
M11	AL	N_A|CRN42	6	30	1.99	RKKRDPYNKYDGDKSNRLALFPETH
M11	AL	N_A|CRN21	319	343	0.67	RDHKREFAKYDRDTNNRLALSREMH
M11	AL	N_A|CRN28	299	323	0.67	RDHKREFAKYDRDTNNRLALSREMH
M11	AL	N_A|CRN29	299	323	0.67	RDHKREFAKYDRDTNNRLALSREMH
M12	AL	N_A|CRN69	1	65	0.91	MKKQKVPNVVSLVSSDLKKNLVRFKPIGLARKPSDVMQLLTALRNILTAMVALHKIELMHRDLRW
M12	AL	N_A|CRN45	222	286	0.91	LEEHAIPNVDRLDHADKNTMRLIFKPRGQERRPANLVELFRALANVLQALVKLHAASWMHRDIRW
M12	AL	N_A|CRN78	8	60	1.06	...........VVTVDSDQLRLTLMPRGIEMKLSSLSELFLALWNVLKTLV-VHRNRWMHRDIRW
M12	AL	N_A|CRN53	20	61	1.12	.......................FTPRGIDTKPANLKELFGAIGDVLAALVMLHDASWMHRDIRW
M13	AL	N_A|CRN53	63	89	0.94	NVMRRRNGSNSWFLIDYMNVEQSPAVS
M13	AL	N_A|CRN45	288	314	0.56	NVIKSRDGDNSWFLIDFMDAAQTPQLS
M13	AL	N_A|CRN23	398	423	0.56	.IIKSRDADNSWFLIDFMNASRSPQAS
M13	AL	N_A|CRN78	62	85	1.94	NVIK-QIGHVEWYLIDFADAAQSPQ..
M14	AL	N_A|CRN29	199	298	0.67	NALQEEPVTLGSPLNGQEVTTSVAQFEGVPTELTRIYFIHYDPLESESPQDTMSSISLTSSVSILDASTDEFRYQRIEHERYFLPYGNAESCHLVSRKQS
M14	AL	N_A|CRN21	219	318	0.67	NALQEEPVTLGSPLNGQEVTTSVAQFEGVPTELTRIYFIHYDPLESESPQDTMSSISLTSSVSILDASTDEFRYQRIEHERYFLPYGNAESCHLVSRKQS
M14	AL	N_A|CRN28	199	298	0.67	NALQEEPVTLGSPLNGQEVTTSVAQFEGVPTELTRIYFIHYDPLESESPQDTMSSISLTSSVSILDASTDEFRYQRIEHERYFLPYGNAESCHLVSRKQS
M14	AL	N_A|CRN65	105	191	1.99	..LNEEIVTEMSPLEGLTIQTEVTEVAGEPTELHPVGYFDYSSLPIEFPDGVLSSM--------VDRTSDEFKYQRIEHEDIFGPYGMAYNWCLVTR...
M15	AL	N_A|CRN11	19	106	0.60	.....DAKRKMFIAAVLEAVCLLLGD----VEILCEEEVNGKNVRVHSQFEFVLKRGPKRISIVEAKRDNIEQGLAQKITGLEVLA------DVEGLEQTFGI....
M15	AL	N_A|CRN64	137	228	0.60	.....EATRIQFMSAIFESVVYMFKTDEQRVRLQAQATLTGNYVRSNGVVDFLITRGKKTVCVVEAKDWQFKKGSAQSVLGMQVAA------DTNEEEVVYGV....
M15	AL	N_A|CRN14	294	355	1.13	...................................ESKMVGQYVKANGTVDFRITRGTKMVCVIEAKDDDFKKGSAQSILGMEVAV------DNNNEECVYGV....
M15	AL	N_A|CRN35	112	215	1.68	VATASDEDKTTLIDAVMRAVCRECTS---QTKIERHVLFKGKALESFGRVDLLRDGNLENAIVVECDEQNFDKGIARMVITAETALLERLEKDPQMDEHIYGIVSDL
M16	AL	N_A|CRN45	1	184	0.64	MDKLFRIDNTEPCVEFLYQIGSRVVESVDPGDTKYSFVSFWDDLIRHVLNFV--SIGKSDRNTSRSESTG--RPDYLFIVDSVCVFRGEEKAPGEQMETPRRELFEKL----VWSYGDAPYLFGYAAVGYEVRLYAITRVHDDVDAIELGVYDLKHLEGRCRLLLAILNVARLLRSLASECPESARDEYMAI...
M16	AL	N_A|CRN23	188	375	0.64	MAKLFKIDNLKQCVNFLFRIGSRIVYATDPGDTKKSFILFWDDLIRNVLNFVLHDIGKSVRNSSRSASTGSNRPDYLFIVDSVCVFCGEEKAPGEQLETPRRELVEKL----VWSYGDAPYLFGYAAVGYEARLYVITRVHDDVDAMELGVFDLKHLEGRFRLLLAILNVARLLRSLAKALFQRAKDHIEAV...
M16	AL	N_A|CRN58	269	372	1.24	........................................................................RPDYILQYKGLLLMRGEEMSSLESIAKAQAELTTKMRRWNVMLYGDLPYILGYATSGSDLQVVAIER--SDGPCRATVILDFNIFEDKAGALKVFYNLAFLLHKMA.................
M16	AL	N_A|CRN45	186	221	1.47	...............................................................................................................................................................RDQVIRILLEPSRVVKCFPKALFQRAKDHVEAVYKV
M17	AL	N_A|CRN21	344	365	1.00	GFYDALSYDVPIVNMVPVPGPV
M17	AL	N_A|CRN28	324	345	1.00	GFYDALSYDVPIVNMVPVPGPV
M17	AL	N_A|CRN29	324	345	1.00	GFYDALSYDVPIVNMVPVPGPV
M18	AL	N_A|CRN45	315	407	0.75	PSGNHLSEAEHAPEIFSDGI-HTTAVDVWSVGRLIQTCGGEVYGSWYDTGRERTQFLELLMHDDPSRRPTAVAALDRLHQLEQEYLKRRKRQRR
M18	AL	N_A|CRN23	424	516	0.75	PSGNHLSQAEHAPEIFSDGN-HTTAVDVWSVGRLIQTCGDVVYGSWYDTGRERTQFLELLMHNDPSKRPTAVAALDRLRQLDQEYLKRQNRNGR
M18	AL	N_A|CRN73	26	103	1.49	PSEEHLRPGSHAPEIHDTNVKHTTAVDSWSVGYLLRGM-DKLWGD----GGERTAFRKALMKEDPSQRPTAMDALQKLEELKK...........
M19	AL	N_A|CRN50	50	144	0.75	VGSKRPADDEIAKVLEKLKLF--------------LPKTLTEFIPLSLLEDEFRLDSLSTTRQSVDPIVMTPTVHKIWKGFGEFPPYYFVRMEQVVFWKVIKKLLFGED
M19	AL	N_A|CRN57	12	120	0.75	VGSKRSADDEIADVQKRLRLLESDLAAIKPSLAAIKPKTLTKFTPLSVHEDEFRLDSLSIMQQSHDPIVRTPTLYKFWEGFGEFPPYYFVRVEEVMFWEVIKKQLFGKD
M19	AL	N_A|CRN31	161	225	1.49	........................................TQTISVSADELSLLCDVLKQDKQTEQNLIATSGLREFWKGYGGFPSSYFVRKEELVLWRLVMRMM....
M20	AL	N_A|CRN50	173	269	0.75	KGSYSRLANLSLIDIMAVRLQA------------EGTFVLIDGPNQDEAEDAKND--------------------SRIVVLPAWRDADLLQYGKLT--NRVIEAGLRKIKRQNTPWPKLVKKQYFYSGGCL
M20	AL	N_A|CRN57	172	300	0.75	QGSYARLTNLSPIDIVAIRDQVTPKSVEGEVDEKEAPIVLVDGFNQAEVNDTKNEYDPFHFLATSCQFDVKHDDRSRLVVLPAWRDADLLQYAKLM--NWVIETGLRQIKRQDTPFPKLVKEQYFYSGGSL
M20	AL	N_A|CRN31	338	396	1.49	......................................................................EDAYSTDEVVLPAWRFNDLLRYAELNLEDWKQMTGLDQEKGK-TPL-ELAQEQYFYSGGSL
M21	AL	N_A|CRN61	10	98	0.75	.....TGVCFFENRSVTLKMCLVKDDTCNKLDKGYVGEFNSTGSLMLYSFIYAALCGNGKFYADEKTRVAVNTVLRKRCKNQMNPFVVFLDNFP
M21	AL	N_A|CRN34	332	416	0.75	.....DVELGYSRRASAFLRCVAAD--LPSLENAGMFSISKVQESYTFGFIEALLSGKATFAQLCTRRKVMNAV--KKLEEGDKRCVFFLDNFP
M21	AL	N_A|CRN60	137	191	1.49	GRKKDDVLNGFRNISHAFMRCVKKD--LPCVGDGSVSEISQQNELYTYSFLYAVLGG.....................................
M22	AL	N_A|CRN2	88	241	1.49	...............................................................................LFIFSKVPELVDTAFIVLRKK--PLIFLHWYHHITVLLFCWHAFATLSASGLYF-VAMNYSVHAVMYFYYFLTACGYRPRWARLVTIFQLSQMGVGVAVCGLNVYYMKQGDECSVDPDNLKWGIIMY-SSYFALFLKFFIERYLLRSAKKSAAGSAKK
M22	AL	N_A|CRN18	125	277	0.75	...............................................................................LFYLSKMLDLCDTVFIILGKKWKQLSILHVYHHLTVLFVYYVTFRAAQDGDSYATIVLNGFVHTIMYTYYFVSAHTRNIWWKKYLTRIQLIQF-VTMNVQG----YLTYSRQCPGMPPKVPLMYLVYVQSLFWLFMNFYIRAYVFGPKKPAVEDSKKK
M22	AL	N_A|CRN3	83	313	0.75	AFAICVAYVSFVVIGTLVMKAGVPAIKTSPLQFIYNPLQVVLCSYMCMEAGILAYRNGYSATPCNAFNAEKPVMGNVLYMFYLSKILDFFDTIFIILGKKWKQLSFLHVYHHLTIFAIYFMNFRVAYDGDIYATVILNGFIHTIMYMYYFVSAHTRDIWWKKYLTAMQLIQF-VTMNVQG----YFMVSRSCENFPHKVPVIYLIYIQSLFWLFMNFFIKSYCSKPRKSSNKKKTQ.

## Sheet: Consensus sequence_motif_ IAC
IAC 01/95.1 isolate
Motif	Consensus sequence
M1	KQYVEMDPWWKLNNDEYFGPNFQPGEEEEIHVLVVVPEDTEEEVRALFRYNDNQREQQS
M2	LYLAKKDDDDNAWLTEAGAESVVLDTNGLPHLDVHQA
M3	EIFGDVDADQLRLYLAKKKGGEWLSADSPDVKALZDGDVSAQIKGILQQQ
M4	IRHCYPALWELCLERIHDESKNGPRVVIVGNPGIGKSCFLMYILFYLARSEKKKVLVVKRLPPF
M5	KLTLYLARKKGGNETKWLKHDHNVTDFLRGDVD
M6	MTSRGKVQMDDDAHWKVKEHIVWSWSLDEYLAAITNQEFYEKVASKLDATSSLDLNDNSDEVQ
M7	NVALWYDEDKTLCIHILFKTNENALRFD
M8	ASADVAPRQQTGLWLVRGKIYNAMDTKGVRCRLYRLAGTYNGYYDPKRRTGNK
M9	VESKYYYAGGSCRFMFQYHTQEVKTALEKAVETAN
M10	ICIESVSEHPVIGNRYEVKLFVKALDAHCDRLIFSRLKEGATVSDDPLEMRTSVHVENPETFRLCMEWKHDEIDERWQSFLGGTS
M11	RDHKDPYNKYDGDTNNRLALFPEMH
M12	MEEHKIPNVDRLVTADKBQMRLTFKPRGIERKPANLMELFTALWNVLKALVMLHKASWMHRDIRW
M13	NVIKRRDGHNEWYLIDFMDAAQSPQVS
M14	NALNEEPVTEGSPLNGQEVTTEVTQFEGEPTELHPIYYFHYDPLPSEFPDDTMSSMSLTSSVSILDRTTDEFRYQRIEHEDYFGPYGNAYNWCLVTRKQS
M15	VATASDEDKTTFIDAVMRAVCRECTSDEQQTKIERHVKFKGKYVKSNGRVDFLIDRGTKNVCVVECKDDNFDKGIAQMVLGMEVALLERLEKDPNNDEHVYGIVSDL
M16	MDKLFRIDNTEPCVNFLYRIGSRIVYATDPGDTKYSFILFWDDLIRHVLNFVLHDIGKSDRNTSRSESTGSNRPDYLFQYDGVCVFRGEEKAPGEQIETPRRELTEKMRRWNVWSYGDAPYLFGYATVGYDLRLYAITRVHDDGPCRETGVFDFNHFEGRDQVLRVLLNPARLLRCFAKALFQRAKDHVEAVYKV
M17	GFYDALSYDVPIVNMVPVPGPV
M18	PSGNHLRPGEHAPEIHDDGVKHTTAVDVWSVGYLIQGCGDKVWGDWYDTGGERTQFRELLMHEDPSQRPTAMDALDRLEQLKQEYLKRRNRNGR
M19	VGSKRPADDEIADVQERLRLFESDLAAIKPSLAAIKPKTLTQFIPLSADEDEFRCDSLKQDKQTEDPIVATPGLHKFWKGYGGFPPYYFVRKEEVVFWRVIKKMMFGED
M20	QGSYARLTNLSPIDIMAIRDQATPKSVEGEVDEKEGPFVLIDGPNQDEANDTKNDYDPFHFLATSCQFDVEDAYSTDEVVLPAWRDNDLLQYAKLNLENWKQETGLDQEKGQNTPWPKLVKEQYFYSGGSL
M21	GRKKDDVLNGFRNRSHAFMRCVKKDDTLPCLGDGSVSEISQQNELYTYSFIYAVLGGNGKFYQDCKRRKAMNTVLRKRCENGDNPCVFFLDNFP
M22	AFAICVAYVSFVVIGTLVMKAGVPAIKTSPLQFIYNPLQVVLCSYMCMEAGILAYRNGYSATPCNAFNAEKPVMGNVLYLFYFSKVPDLVDTVFIILGKKWKPLSFLHWYHHLTVLLFCWHAFRTASDGDLYFTVVMNYFVHTIMYFYYFVTACGYRPWWKKYLTIFQLIQFGVGMNVCGLNVYYMKQGDECSVDPDNVPWGYLMYIQSYFWLFMNFFIERYLLRPAKKSAAGSAKK

## Sheet: Position_motif_IAC
IAC 01/95.1 isolate
Gene_name	Motif	Position	Motif	Position	Motif	Position	Motif	Position	Motif	Position	Motif	Position	Motif	Position	Motif	Position
PpCRN71	M3	53-88	M1	89-144
PpCRN72	M3	53-88	M1	89-144
PpCRN5
PpCRN9
PpCRN7	M2	49-81
PpCRN33
PpCRN6	M3	44-81
PpCRN17
PpCRN27	M2	181-217
PpCRN10	M1	86-117	M2	55-76
PpCRN20	M2	48-80
PpCRN15
PpCRN34	M3	40-79	M3	176-217	M21	332-416
PpCRN41	M6	60-106	M9	125-159
PpCRN43	M6	62-124	M9	144-168
PpCRN30	M2	3-30	M1	38-62	M6	237-285	M9	299-333
PpCRN59
PpCRN69	M12	1-65
PpCRN51
PpCRN57	M19	12-120	M4	121-153	M20	172-300
PpCRN38	M3	58-90
PpCRN37
PpCRN4
PpCRN44
PpCRN46
PpCRN19	M5	33-61	M1	62-94
PpCRN36	M1	22-47
PpCRN56	M1	66-92
PpCRN70
PpCRN54	M4	23-64
PpCRN62	M4	93-123
PpCRN8
PpCRN77
PpCRN35	M15	112-215
PpCRN52
PpCRN12	M1	1-32
PpCRN23	M5	52-77	M1	86-117	M16	188-375	M13	398-423	M18	424-516
PpCRN48	M2	1-33
PpCRN49	M1	42-75	M7	86-113
PpCRN73	M18	26-103
PpCRN55
PpCRN79	M6	2-55
PpCRN74	M9	24-56
PpCRN31	M3	62-105	M19	161-225	M4	226-270	M20	338-396
PpCRN60	M21	137-191
PpCRN65	M8	40-75	M14	105-191
PpCRN26	M2	91-111	M1	123-175
PpCRN58	M5	52-83	M1	87-118	M16	269-372
PpCRN14	M2	50-69	M1	85-117	M15	294-355
PpCRN40
PpCRN50	M1	12-46	M19	50-144	M4	145-171	M20	173-269
PpCRN21	M5	51-83	M1	89-118	M8	119-171	M7	172-193	M14	219-318	M11	319-343	M17	344-365	M10	366-439
PpCRN28	M5	51-83	M1	89-118	M8	119-171	M7	172-198	M14	199-298	M11	299-323	M17	324-345
PpCRN29	M5	51-83	M1	89-118	M8	119-171	M7	172-198	M14	199-298	M11	299-323	M17	324-345	M10	346-419
PpCRN3	M22	83-313
PpCRN18	M22	125-277
PpCRN76
PpCRN16
PpCRN39	M4	37-71
PpCRN1
PpCRN24
PpCRN67	M3	434-472
PpCRN11	M15	19-106
PpCRN25	M1	90-121
PpCRN68	M4	12-42
PpCRN13	M1	37-67
PpCRN66
PpCRN80	M6	148-178
PpCRN42	M11	6-30	M10	42-126
PpCRN47	M10	3-87
PpCRN45	M16	1-184	M16	186-221	M12	222-286	M13	288-314	M18	315-407
PpCRN53	M12	20-61	M13	63-89
PpCRN22
PpCRN61	M21	10-98
PpCRN75
PpCRN32	M1	32-58	M4	123-177
PpCRN78	M12	8-60	M13	62-85
PpCRN2	M22	88-241
PpCRN63
PpCRN64	M15	137-228

## Sheet: IAC_candidate Cinkler
Protein	LXLFLAK Domain	SignalP_EUK_Description	SignalP_GRAM_POSITIVE_Description	Phobius_Description	Phobius_ID	CDD_Description	CDD_ID	Coils	Gene3D	GO_terms	IPR_Description	IPR_ID	MobiDBLite_Description	MobiDBLite_ID	PANTHER_Description	Pfam_Description	Pfam_ID	Prints_Description	Prints_ID	ProSitePatterns_Description	ProSitePatterns_ID	ProSiteProfiles_Description	ProSiteProfiles_ID	SFLD_Description	SFLD_ID	SMART	SUPERFAMILY	TIGRFAM_Description	TIGRFAM_ID	TMHMM
PpCRN5	LKLYLAK	SignalP-noTM': 1	-	Hydrophobic region of a signal peptide.': 1, 'Region of a membrane-bound protein predicted to be outside the membrane, in the extracellular region.': 1, 'N-terminal region of a signal peptide.': 1, 'C-terminal region of a signal peptide.': 1, 'Signal peptide region': 1	NON_CYTOPLASMIC_DOMAIN': 1, 'SIGNAL_PEPTIDE': 1, 'SIGNAL_PEPTIDE_N_REGION': 1, 'SIGNAL_PEPTIDE_C_REGION': 1, 'SIGNAL_PEPTIDE_H_REGION': 1	-	-	-	-	-	-	-	-	-	-	-	-	-	-	-	-	-	-	-	-	-	-	-	-	-
PpCRN15	LSLFLAK	-	-	Hydrophobic region of a signal peptide.': 1, 'Region of a membrane-bound protein predicted to be outside the membrane, in the extracellular region.': 1, 'N-terminal region of a signal peptide.': 1, 'C-terminal region of a signal peptide.': 1, 'Signal peptide region': 1	NON_CYTOPLASMIC_DOMAIN': 1, 'SIGNAL_PEPTIDE': 1, 'SIGNAL_PEPTIDE_N_REGION': 1, 'SIGNAL_PEPTIDE_C_REGION': 1, 'SIGNAL_PEPTIDE_H_REGION': 1	-	-	-	-	-	-	-	-	-	-	-	-	-	-	-	-	-	-	-	-	-	-	-	-	-
PpCRN14	LRLFLAR	SignalP-noTM': 1	-	Hydrophobic region of a signal peptide.': 1, 'Region of a membrane-bound protein predicted to be outside the membrane, in the extracellular region.': 1, 'N-terminal region of a signal peptide.': 1, 'C-terminal region of a signal peptide.': 1, 'Signal peptide region': 1	NON_CYTOPLASMIC_DOMAIN': 1, 'SIGNAL_PEPTIDE': 1, 'SIGNAL_PEPTIDE_N_REGION': 1, 'SIGNAL_PEPTIDE_C_REGION': 1, 'SIGNAL_PEPTIDE_H_REGION': 1	-	-	Coil': 1	G3DSA:3.10.20.90': 1	-	-	-	-	-	-	-	-	-	-	-	-	-	-	-	-	-	-	-	-	-
PpCRN17	LDLFLAR	-	-	Hydrophobic region of a signal peptide.': 1, 'Region of a membrane-bound protein predicted to be outside the membrane, in the extracellular region.': 1, 'N-terminal region of a signal peptide.': 1, 'C-terminal region of a signal peptide.': 1, 'Signal peptide region': 1	SIGNAL_PEPTIDE': 1, 'NON_CYTOPLASMIC_DOMAIN': 1, 'SIGNAL_PEPTIDE_N_REGION': 1, 'SIGNAL_PEPTIDE_C_REGION': 1, 'SIGNAL_PEPTIDE_H_REGION': 1	-	-	-	-	-	-	-	-	-	-	-	-	-	-	-	-	-	-	-	-	-	-	-	-	-
PpCRN20	MNLFLAK	SignalP-noTM': 1	-	Hydrophobic region of a signal peptide.': 1, 'Region of a membrane-bound protein predicted to be outside the membrane, in the extracellular region.': 1, 'N-terminal region of a signal peptide.': 1, 'C-terminal region of a signal peptide.': 1, 'Signal peptide region': 1	NON_CYTOPLASMIC_DOMAIN': 1, 'SIGNAL_PEPTIDE': 1, 'SIGNAL_PEPTIDE_N_REGION': 1, 'SIGNAL_PEPTIDE_C_REGION': 1, 'SIGNAL_PEPTIDE_H_REGION': 1	-	-	-	G3DSA:3.10.20.90': 1	-	-	-	-	-	-	-	-	-	-	-	-	-	-	-	-	-	-	-	-	-
PpCRN33	LRLFLTK	-	-	Hydrophobic region of a signal peptide.': 1, 'Region of a membrane-bound protein predicted to be outside the membrane, in the extracellular region.': 1, 'N-terminal region of a signal peptide.': 1, 'C-terminal region of a signal peptide.': 1, 'Signal peptide region': 1	NON_CYTOPLASMIC_DOMAIN': 1, 'SIGNAL_PEPTIDE': 1, 'SIGNAL_PEPTIDE_N_REGION': 1, 'SIGNAL_PEPTIDE_C_REGION': 1, 'SIGNAL_PEPTIDE_H_REGION': 1	-	-	-	G3DSA:3.10.20.90': 1	-	-	-	-	-	-	-	-	-	-	-	-	-	-	-	-	-	-	-	-	-
PpCRN7	NLYLATK	SignalP-noTM': 1	SignalP-TM': 1	Hydrophobic region of a signal peptide.': 1, 'Region of a membrane-bound protein predicted to be outside the membrane, in the extracellular region.': 1, 'N-terminal region of a signal peptide.': 1, 'C-terminal region of a signal peptide.': 1, 'Signal peptide region': 1	NON_CYTOPLASMIC_DOMAIN': 1, 'SIGNAL_PEPTIDE': 1, 'SIGNAL_PEPTIDE_N_REGION': 1, 'SIGNAL_PEPTIDE_C_REGION': 1, 'SIGNAL_PEPTIDE_H_REGION': 1	-	-	-	G3DSA:3.10.20.90': 1	-	-	-	-	-	-	-	-	-	-	-	-	-	-	-	-	-	-	-	-	-
PpCRN52		-	-	Hydrophobic region of a signal peptide.': 1, 'Region of a membrane-bound protein predicted to be outside the membrane, in the extracellular region.': 1, 'N-terminal region of a signal peptide.': 1, 'C-terminal region of a signal peptide.': 1, 'Signal peptide region': 1	SIGNAL_PEPTIDE': 1, 'NON_CYTOPLASMIC_DOMAIN': 1, 'SIGNAL_PEPTIDE_N_REGION': 1, 'SIGNAL_PEPTIDE_C_REGION': 1, 'SIGNAL_PEPTIDE_H_REGION': 1	-	-	-	-	-	-	-	-	-	-	-	-	-	-	-	-	-	-	-	-	-	-	-	-	-
PpCRN13	LDEFLAK
PpCRN27	LHLFLAK	-	-	-	-	-	-	-	G3DSA:3.10.20.90': 1	-	-	-	consensus disorder prediction': 1	mobidb-lite': 1	-	-	-	-	-	-	-	-	-	-	-	-	-	-	-	-
PpCRN37	LRLFLAK	-	-	-	-	-	-	Coil': 1	-	GO:0005488': 9	Armadillo-type fold': 9, 'Nucleolar pre-ribosomal-associated protein 1, N-terminal': 1, 'Nucleolar pre-ribosomal-associated protein 1, C-terminal domain': 1	IPR016024': 9, 'IPR032436': 1, 'IPR021714': 1	consensus disorder prediction': 1	mobidb-lite': 1	PTHR13500': 1	Nucleolar pre-ribosomal-associated protein 1': 1, 'Ribosome 60S biogenesis N-terminal': 1	PF16201': 1, 'PF11707': 1	-	-	-	-	-	-	-	-	-	SSF48371': 9	-	-	-
PpCRN50	LKLFLPK	-	-	-	-	-	-	-	G3DSA:3.40.50.300': 1	-	P-loop containing nucleoside triphosphate hydrolase': 1	IPR027417': 1	-	-	-	-	-	-	-	-	-	-	-	-	-	-	SSF52540': 1	-	-	-
PpCRN56	LELFLAR
PpCRN4		-	SignalP-TM': 1	-	-	-	-	-	-	-	-	-	-	-	-	-	-	-	-	-	-	-	-	-	-	-	-	-	-	-
PpCRN1		-	-	-	-	-	-	-	-	-	-	-	-	-	-	-	-	-	-	-	-	-	-	-	-	-	SSF81585': 1	-	-	-
PpCRN10		-	-	-	-	-	-	-	-	-	-	-	-	-	PTHR33129': 1	-	-	-	-	-	-	-	-	-	-	-	-	-	-	-
PpCRN11
PpCRN12
PpCRN16
PpCRN19
PpCRN21
PpCRN23		-	-	-	-	-	-	-	G3DSA:1.10.510.10': 2	-	Protein kinase-like domain': 1	IPR011009': 1	-	-	PTHR33129': 1	-	-	-	-	-	-	-	-	-	-	-	SSF56112': 1	-	-	-
PpCRN24
PpCRN25		-	-	-	-	-	-	-	-	-	-	-	consensus disorder prediction': 1	mobidb-lite': 1	-	-	-	-	-	-	-	-	-	-	-	-	-	-	-	-
PpCRN28
PpCRN29
PpCRN30		-	-	-	-	AAA': 1	cd00009': 1	-	G3DSA:3.40.50.300': 1	-	P-loop containing nucleoside triphosphate hydrolase': 1	IPR027417': 1	-	-	PTHR33129': 1	-	-	-	-	-	-	-	-	-	-	-	SSF52540': 1	-	-	-
PpCRN32		-	-	-	-	-	-	-	-	-	P-loop containing nucleoside triphosphate hydrolase': 1	IPR027417': 1	consensus disorder prediction': 1	mobidb-lite': 1	PTHR33129': 1	-	-	-	-	-	-	-	-	-	-	-	SSF52540': 1	-	-	-
PpCRN34		-	-	-	-	-	-	-	G3DSA:3.40.50.300': 1	-	P-loop containing nucleoside triphosphate hydrolase': 2	IPR027417': 2	-	-	-	-	-	-	-	-	-	-	-	-	-	-	SSF52540': 2	-	-	-
PpCRN35
PpCRN36
PpCRN38
PpCRN40		-	-	-	-	-	-	-	-	-	-	-	consensus disorder prediction': 1	mobidb-lite': 1	-	-	-	-	-	-	-	-	-	-	-	-	-	-	-	-
PpCRN41
PpCRN42
PpCRN43
PpCRN44
PpCRN45		-	-	-	-	PKc': 1	cd00180': 1	-	G3DSA:1.10.510.10': 2	GO:0004672|GO:0005524|GO:0006468': 2	Protein kinase domain': 2, 'Protein kinase-like domain': 1	IPR000719': 2, 'IPR011009': 1	-	-	PTHR23139': 1, 'PTHR23139:SF93': 1	Protein kinase domain': 1	PF00069': 1	-	-	-	-	Protein kinase domain profile.': 1	PS50011': 1	-	-	-	SSF56112': 1	-	-	-
PpCRN46
PpCRN47
PpCRN48
PpCRN49
PpCRN51		-	-	-	-	-	-	-	-	-	-	-	-	-	PTHR33129': 1	-	-	-	-	-	-	-	-	-	-	-	-	-	-	-
PpCRN53		-	-	-	-	-	-	-	G3DSA:1.10.510.10': 1	-	Protein kinase-like domain': 1	IPR011009': 1	-	-	PTHR23139': 1, 'PTHR23139:SF93': 1	-	-	-	-	-	-	-	-	-	-	-	SSF56112': 1	-	-	-
PpCRN54		-	-	-	-	-	-	-	G3DSA:3.40.50.300': 1	-	P-loop containing nucleoside triphosphate hydrolase': 1	IPR027417': 1	-	-	-	-	-	-	-	-	-	-	-	-	-	-	SSF52540': 1	-	-	-
PpCRN55
PpCRN58
PpCRN59		-	-	-	-	-	-	-	-	-	-	-	consensus disorder prediction': 1	mobidb-lite': 1	-	-	-	-	-	-	-	-	-	-	-	-	-	-	-	-
PpCRN6		-	-	-	-	-	-	-	-	-	-	-	consensus disorder prediction': 1	mobidb-lite': 1	-	-	-	-	-	-	-	-	-	-	-	-	-	-	-	-
PpCRN60
PpCRN61
PpCRN62		-	-	-	-	AAA': 1	cd00009': 1	-	G3DSA:3.40.50.300': 1	-	P-loop containing nucleoside triphosphate hydrolase': 1	IPR027417': 1	-	-	PTHR33129': 1	-	-	-	-	-	-	-	-	-	-	-	SSF52540': 1	-	-	-
PpCRN63
PpCRN64		-	-	-	-	-	-	Coil': 1	-	-	-	-	-	-	-	-	-	-	-	-	-	-	-	-	-	-	-	-	-	-
PpCRN65
PpCRN66
PpCRN67		-	-	-	-	-	-	-	G3DSA:1.25.40.20': 2	-	Ankyrin repeat-containing domain': 3	IPR020683': 3	consensus disorder prediction': 1	mobidb-lite': 1	-	-	-	-	-	-	-	-	-	-	-	-	SSF48403': 1	-	-	-
PpCRN68		-	-	-	-	-	-	Coil': 1	G3DSA:3.40.50.300': 1	-	-	-	-	-	-	-	-	-	-	-	-	-	-	-	-	-	-	-	-	-
PpCRN69		-	-	-	-	-	-	-	-	-	Protein kinase-like domain': 1	IPR011009': 1	-	-	-	-	-	-	-	-	-	-	-	-	-	-	SSF56112': 1	-	-	-
PpCRN70
PpCRN71
PpCRN72
PpCRN73		-	-	-	-	-	-	-	G3DSA:1.10.510.10': 2	-	Protein kinase-like domain': 1	IPR011009': 1	-	-	-	-	-	-	-	-	-	-	-	-	-	-	SSF56112': 1	-	-	-
PpCRN74
PpCRN75		-	-	-	-	-	-	-	G3DSA:3.90.1200.10': 1	-	Aminoglycoside phosphotransferase': 1, 'Protein kinase-like domain': 1	IPR011009': 1, 'IPR002575': 1	-	-	-	Phosphotransferase enzyme family': 1	PF01636': 1	-	-	-	-	-	-	-	-	-	SSF56112': 1	-	-	-
PpCRN76
PpCRN77
PpCRN78		-	-	-	-	-	-	Coil': 1	G3DSA:1.10.510.10': 1	-	Protein kinase-like domain': 1	IPR011009': 1	-	-	PTHR23139:SF77': 1, 'PTHR23139': 1	-	-	-	-	-	-	-	-	-	-	-	SSF56112': 1	-	-	-
PpCRN79
PpCRN80
PpCRN9
PpCRN26	LLLFLAK	-	-	Region of a membrane-bound protein predicted to be outside the membrane, in the extracellular region.': 1, 'Region of a membrane-bound protein predicted to be embedded in the membrane.': 1, 'Region of a membrane-bound protein predicted to be outside the membrane, in the cytoplasm.': 1	NON_CYTOPLASMIC_DOMAIN': 1, 'CYTOPLASMIC_DOMAIN': 1, 'TRANSMEMBRANE': 1	-	-	-	-	-	-	-	consensus disorder prediction': 1	mobidb-lite': 1	-	-	-	-	-	-	-	-	-	-	-	-	-	-	-	-
PpCRN2		-	-	Region of a membrane-bound protein predicted to be embedded in the membrane.': 5, 'Region of a membrane-bound protein predicted to be outside the membrane, in the cytoplasm.': 3, 'Region of a membrane-bound protein predicted to be outside the membrane, in the extracellular region.': 3, 'Signal peptide region': 1, 'Hydrophobic region of a signal peptide.': 1, 'N-terminal region of a signal peptide…	TRANSMEMBRANE': 5, 'NON_CYTOPLASMIC_DOMAIN': 3, 'CYTOPLASMIC_DOMAIN': 3, 'SIGNAL_PEPTIDE_C_REGION': 1, 'SIGNAL_PEPTIDE': 1, 'SIGNAL_PEPTIDE_H_REGION': 1, 'SIGNAL_PEPTIDE_N_REGION': 1	-	-	-	-	GO:0016021': 2	ELO family': 2, 'ELO family, conserved site': 1	IPR002076': 2, 'IPR030457': 1	-	-	PTHR11157': 1, 'PTHR11157:SF99': 1	GNS1/SUR4 family': 1	PF01151': 1	-	-	ELO family signature.': 1	PS01188': 1	-	-	-	-	-	-	-	-	TMhelix': 6
PpCRN3		-	-	Region of a membrane-bound protein predicted to be embedded in the membrane.': 7, 'Region of a membrane-bound protein predicted to be outside the membrane, in the extracellular region.': 4, 'Region of a membrane-bound protein predicted to be outside the membrane, in the cytoplasm.': 4	TRANSMEMBRANE': 7, 'NON_CYTOPLASMIC_DOMAIN': 4, 'CYTOPLASMIC_DOMAIN': 4	-	-	-	-	GO:0016021': 2	ELO family': 2, 'ELO family, conserved site': 1	IPR002076': 2, 'IPR030457': 1	-	-	PTHR11157': 1, 'PTHR11157:SF76': 1	GNS1/SUR4 family': 1	PF01151': 1	-	-	ELO family signature.': 1	PS01188': 1	-	-	-	-	-	-	-	-	TMhelix': 7
PpCRN8		-	-	Region of a membrane-bound protein predicted to be outside the membrane, in the extracellular region.': 1, 'Region of a membrane-bound protein predicted to be embedded in the membrane.': 1, 'Region of a membrane-bound protein predicted to be outside the membrane, in the cytoplasm.': 1	TRANSMEMBRANE': 1, 'NON_CYTOPLASMIC_DOMAIN': 1, 'CYTOPLASMIC_DOMAIN': 1	-	-	-	-	-	-	-	-	-	-	-	-	-	-	-	-	-	-	-	-	-	-	-	-	-
PpCRN18		-	-	Region of a membrane-bound protein predicted to be embedded in the membrane.': 7, 'Region of a membrane-bound protein predicted to be outside the membrane, in the extracellular region.': 4, 'Region of a membrane-bound protein predicted to be outside the membrane, in the cytoplasm.': 4	TRANSMEMBRANE': 7, 'CYTOPLASMIC_DOMAIN': 4, 'NON_CYTOPLASMIC_DOMAIN': 4	-	-	-	-	GO:0016021': 2	ELO family': 2	IPR002076': 2	-	-	PTHR11157': 1, 'PTHR11157:SF76': 1	GNS1/SUR4 family': 1	PF01151': 1	-	-	-	-	-	-	-	-	-	-	-	-	TMhelix': 6
PpCRN22		-	-	Region of a membrane-bound protein predicted to be outside the membrane, in the extracellular region.': 1, 'Region of a membrane-bound protein predicted to be embedded in the membrane.': 1, 'Region of a membrane-bound protein predicted to be outside the membrane, in the cytoplasm.': 1	CYTOPLASMIC_DOMAIN': 1, 'TRANSMEMBRANE': 1, 'NON_CYTOPLASMIC_DOMAIN': 1	-	-	-	G3DSA:3.30.200.20': 1, 'G3DSA:1.10.510.10': 1	GO:0004672|GO:0005524|GO:0006468': 3, 'GO:0004672|GO:0006468': 1	Protein kinase domain': 3, 'Serine/threonine-protein kinase, active site': 1, 'Protein kinase-like domain': 1, 'Calcium/calmodulin-dependent/calcium-dependent protein kinase': 1	IPR000719': 3, 'IPR020636': 1, 'IPR008271': 1, 'IPR011009': 1	-	-	PTHR24347': 1, 'PTHR24347:SF300': 1	Protein kinase domain': 1	PF00069': 1	-	-	Serine/Threonine protein kinases active-site signature.': 1	PS00108': 1	Protein kinase domain profile.': 1	PS50011': 1	-	-	SM00220': 1	SSF56112': 1	-	-	-
PpCRN31		-	-	Region of a membrane-bound protein predicted to be outside the membrane, in the extracellular region.': 2, 'Region of a membrane-bound protein predicted to be embedded in the membrane.': 2, 'Region of a membrane-bound protein predicted to be outside the membrane, in the cytoplasm.': 1	NON_CYTOPLASMIC_DOMAIN': 2, 'TRANSMEMBRANE': 2, 'CYTOPLASMIC_DOMAIN': 1	-	-	-	G3DSA:3.30.420.10': 1	GO:0003676': 1	Ribonuclease H-like domain': 1	IPR012337': 1	-	-	PTHR33129': 1	-	-	-	-	-	-	-	-	-	-	-	-	-	-	TMhelix': 1
PpCRN39		-	-	Region of a membrane-bound protein predicted to be outside the membrane, in the extracellular region.': 1, 'Region of a membrane-bound protein predicted to be embedded in the membrane.': 1, 'Region of a membrane-bound protein predicted to be outside the membrane, in the cytoplasm.': 1	NON_CYTOPLASMIC_DOMAIN': 1, 'CYTOPLASMIC_DOMAIN': 1, 'TRANSMEMBRANE': 1	-	-	-	G3DSA:3.40.50.300': 1	-	-	-	-	-	PTHR33129': 1	-	-	-	-	-	-	-	-	-	-	-	-	-	-	TMhelix': 1
PpCRN57		-	-	Region of a membrane-bound protein predicted to be outside the membrane, in the extracellular region.': 1, 'Region of a membrane-bound protein predicted to be embedded in the membrane.': 1, 'Region of a membrane-bound protein predicted to be outside the membrane, in the cytoplasm.': 1	NON_CYTOPLASMIC_DOMAIN': 1, 'CYTOPLASMIC_DOMAIN': 1, 'TRANSMEMBRANE': 1	-	-	Coil': 1	-	-	-	-	-	-	-	-	-	-	-	-	-	-	-	-	-	-	-	-	-	TMhelix': 1
	13

## Sheet: CHvinc_candidate Cinkler
Protein	LXLFLAK Domain	SignalP_EUK_Description	SignalP_GRAM_POSITIVE_Description	Phobius_Description	Phobius_ID	CDD_Description	CDD_ID	Coils	Gene3D	GO_terms	IPR_Description	IPR_ID	MobiDBLite_Description	MobiDBLite_ID	PANTHER_Description	Pfam_Description	Pfam_ID	ProSitePatterns_Description	ProSitePatterns_ID	ProSiteProfiles_Description	ProSiteProfiles_ID	SFLD_Description	SFLD_ID	SMART	SUPERFAMILY	TIGRFAM_Description	TIGRFAM_ID	TMHMM
ETL78966.1	LKLYLAK	SignalP-noTM': 1	-	Signal peptide region': 1, 'Region of a membrane-bound protein predicted to be outside the membrane, in the extracellular region.': 1, 'Hydrophobic region of a signal peptide.': 1, 'C-terminal region of a signal peptide.': 1, 'N-terminal region of a signal peptide.': 1	SIGNAL_PEPTIDE_N_REGION': 1, 'SIGNAL_PEPTIDE_H_REGION': 1, 'NON_CYTOPLASMIC_DOMAIN': 1, 'SIGNAL_PEPTIDE': 1, 'SIGNAL_PEPTIDE_C_REGION': 1	-	-	-	-	-	-	-	-	-	-	-	-	-	-	-	-	-	-	-	-	-	-	-
ETL82391.1	MNLFLAK	SignalP-noTM': 1	-	Signal peptide region': 1, 'Region of a membrane-bound protein predicted to be outside the membrane, in the extracellular region.': 1, 'Hydrophobic region of a signal peptide.': 1, 'C-terminal region of a signal peptide.': 1, 'N-terminal region of a signal peptide.': 1	SIGNAL_PEPTIDE_N_REGION': 1, 'SIGNAL_PEPTIDE_H_REGION': 1, 'NON_CYTOPLASMIC_DOMAIN': 1, 'SIGNAL_PEPTIDE': 1, 'SIGNAL_PEPTIDE_C_REGION': 1	-	-	-	G3DSA:3.10.20.90': 1	-	-	-	-	-	-	-	-	-	-	-	-	-	-	-	-	-	-	-
ETL86483.1	LQLFLAK	SignalP-noTM': 1	-	Signal peptide region': 1, 'Region of a membrane-bound protein predicted to be outside the membrane, in the extracellular region.': 1, 'Hydrophobic region of a signal peptide.': 1, 'C-terminal region of a signal peptide.': 1, 'N-terminal region of a signal peptide.': 1	SIGNAL_PEPTIDE_N_REGION': 1, 'SIGNAL_PEPTIDE_H_REGION': 1, 'NON_CYTOPLASMIC_DOMAIN': 1, 'SIGNAL_PEPTIDE': 1, 'SIGNAL_PEPTIDE_C_REGION': 1	-	-	-	G3DSA:3.10.20.90': 1	-	-	-	-	-	PTHR33129': 1	-	-	-	-	-	-	-	-	-	-	-	-	-
ETL86502.1	LDLFLAP	SignalP-noTM': 1	-	Signal peptide region': 1, 'Region of a membrane-bound protein predicted to be outside the membrane, in the extracellular region.': 1, 'Hydrophobic region of a signal peptide.': 1, 'C-terminal region of a signal peptide.': 1, 'N-terminal region of a signal peptide.': 1	SIGNAL_PEPTIDE_N_REGION': 1, 'SIGNAL_PEPTIDE_H_REGION': 1, 'NON_CYTOPLASMIC_DOMAIN': 1, 'SIGNAL_PEPTIDE': 1, 'SIGNAL_PEPTIDE_C_REGION': 1	-	-	Coil': 1	-	GO:0004553|GO:0005975': 1	Glycoside hydrolase, family 5, conserved site': 1	IPR018087': 1	consensus disorder prediction': 1	mobidb-lite': 1	-	-	-	Glycosyl hydrolases family 5 signature.': 1	PS00659': 1	-	-	-	-	-	-	-	-	-
ETL89757.1	LQLFLAK	SignalP-noTM': 1	-	Signal peptide region': 1, 'Region of a membrane-bound protein predicted to be outside the membrane, in the extracellular region.': 1, 'Hydrophobic region of a signal peptide.': 1, 'C-terminal region of a signal peptide.': 1, 'N-terminal region of a signal peptide.': 1	SIGNAL_PEPTIDE_N_REGION': 1, 'SIGNAL_PEPTIDE_H_REGION': 1, 'NON_CYTOPLASMIC_DOMAIN': 1, 'SIGNAL_PEPTIDE': 1, 'SIGNAL_PEPTIDE_C_REGION': 1	PKc': 1	cd00180': 1	-	G3DSA:1.10.510.10': 2	GO:0004672|GO:0005524|GO:0006468': 3	Protein kinase domain': 3, 'Protein kinase-like domain': 1	IPR000719': 3, 'IPR011009': 1	-	-	PTHR23139': 1, 'PTHR23139:SF93': 1	Protein kinase domain': 1	PF00069': 1	-	-	Protein kinase domain profile.': 1	PS50011': 1	-	-	SM00220': 1	SSF56112': 1	-	-	-
ETM03299.1	KLQLFLAK	SignalP-noTM': 1	-	Signal peptide region': 1, 'Region of a membrane-bound protein predicted to be outside the membrane, in the extracellular region.': 1, 'Hydrophobic region of a signal peptide.': 1, 'C-terminal region of a signal peptide.': 1, 'N-terminal region of a signal peptide.': 1	SIGNAL_PEPTIDE_N_REGION': 1, 'SIGNAL_PEPTIDE_H_REGION': 1, 'NON_CYTOPLASMIC_DOMAIN': 1, 'SIGNAL_PEPTIDE': 1, 'SIGNAL_PEPTIDE_C_REGION': 1	-	-	-	G3DSA:3.10.20.90': 1	-	-	-	-	-	PTHR33129': 1	-	-	-	-	-	-	-	-	-	-	-	-	-
ETL86489.1	LDLFLAR	-	-	Signal peptide region': 1, 'Region of a membrane-bound protein predicted to be outside the membrane, in the extracellular region.': 1, 'Hydrophobic region of a signal peptide.': 1, 'C-terminal region of a signal peptide.': 1, 'N-terminal region of a signal peptide.': 1	SIGNAL_PEPTIDE_N_REGION': 1, 'SIGNAL_PEPTIDE_H_REGION': 1, 'NON_CYTOPLASMIC_DOMAIN': 1, 'SIGNAL_PEPTIDE': 1, 'SIGNAL_PEPTIDE_C_REGION': 1	-	-	-	-	-	-	-	-	-	-	-	-	-	-	-	-	-	-	-	-	-	-	-
ETL95208.1	LSLFLAK	-	-	Signal peptide region': 1, 'Region of a membrane-bound protein predicted to be outside the membrane, in the extracellular region.': 1, 'Hydrophobic region of a signal peptide.': 1, 'C-terminal region of a signal peptide.': 1, 'N-terminal region of a signal peptide.': 1	SIGNAL_PEPTIDE_N_REGION': 1, 'SIGNAL_PEPTIDE_H_REGION': 1, 'NON_CYTOPLASMIC_DOMAIN': 1, 'SIGNAL_PEPTIDE': 1, 'SIGNAL_PEPTIDE_C_REGION': 1	-	-	-	-	-	-	-	-	-	-	-	-	-	-	-	-	-	-	-	-	-	-	-
ETL99626.1	LRLFLTK	-	-	Signal peptide region': 1, 'Region of a membrane-bound protein predicted to be outside the membrane, in the extracellular region.': 1, 'Hydrophobic region of a signal peptide.': 1, 'C-terminal region of a signal peptide.': 1, 'N-terminal region of a signal peptide.': 1	SIGNAL_PEPTIDE_N_REGION': 1, 'SIGNAL_PEPTIDE_H_REGION': 1, 'NON_CYTOPLASMIC_DOMAIN': 1, 'SIGNAL_PEPTIDE': 1, 'SIGNAL_PEPTIDE_C_REGION': 1	-	-	-	G3DSA:3.10.20.90': 1	-	-	-	-	-	PTHR33129': 1	-	-	-	-	-	-	-	-	-	-	-	-	-
ETM01804.1	LQLFLAK	-	-	Signal peptide region': 1, 'Region of a membrane-bound protein predicted to be outside the membrane, in the extracellular region.': 1, 'Hydrophobic region of a signal peptide.': 1, 'C-terminal region of a signal peptide.': 1, 'N-terminal region of a signal peptide.': 1	SIGNAL_PEPTIDE_N_REGION': 1, 'SIGNAL_PEPTIDE_H_REGION': 1, 'NON_CYTOPLASMIC_DOMAIN': 1, 'SIGNAL_PEPTIDE': 1, 'SIGNAL_PEPTIDE_C_REGION': 1	-	-	-	-	-	-	-	-	-	-	-	-	-	-	-	-	-	-	-	-	-	-	-
ETM00567.1		SignalP-noTM': 1	SignalP-TM': 1	Signal peptide region': 1, 'Region of a membrane-bound protein predicted to be outside the membrane, in the extracellular region.': 1, 'Hydrophobic region of a signal peptide.': 1, 'C-terminal region of a signal peptide.': 1, 'N-terminal region of a signal peptide.': 1	SIGNAL_PEPTIDE_N_REGION': 1, 'SIGNAL_PEPTIDE_H_REGION': 1, 'NON_CYTOPLASMIC_DOMAIN': 1, 'SIGNAL_PEPTIDE': 1, 'SIGNAL_PEPTIDE_C_REGION': 1	-	-	-	G3DSA:3.10.20.90': 1	-	-	-	-	-	-	-	-	-	-	-	-	-	-	-	-	-	-	-
ETM01281.1		-	SignalP-TM': 1	Signal peptide region': 1, 'Region of a membrane-bound protein predicted to be outside the membrane, in the extracellular region.': 1, 'Hydrophobic region of a signal peptide.': 1, 'C-terminal region of a signal peptide.': 1, 'N-terminal region of a signal peptide.': 1	SIGNAL_PEPTIDE_N_REGION': 1, 'SIGNAL_PEPTIDE_H_REGION': 1, 'NON_CYTOPLASMIC_DOMAIN': 1, 'SIGNAL_PEPTIDE': 1, 'SIGNAL_PEPTIDE_C_REGION': 1	-	-	Coil': 1	-	-	-	-	-	-	-	-	-	-	-	-	-	-	-	-	-	-	-	-
ETL85419.1		-	-	Signal peptide region': 1, 'Region of a membrane-bound protein predicted to be outside the membrane, in the extracellular region.': 1, 'Hydrophobic region of a signal peptide.': 1, 'C-terminal region of a signal peptide.': 1, 'N-terminal region of a signal peptide.': 1	SIGNAL_PEPTIDE_N_REGION': 1, 'SIGNAL_PEPTIDE_H_REGION': 1, 'NON_CYTOPLASMIC_DOMAIN': 1, 'SIGNAL_PEPTIDE': 1, 'SIGNAL_PEPTIDE_C_REGION': 1	-	-	-	-	-	-	-	-	-	-	-	-	-	-	-	-	-	-	-	-	-	-	-
ETL86482.1		-	-	Signal peptide region': 1, 'Region of a membrane-bound protein predicted to be outside the membrane, in the extracellular region.': 1, 'Hydrophobic region of a signal peptide.': 1, 'C-terminal region of a signal peptide.': 1, 'N-terminal region of a signal peptide.': 1	SIGNAL_PEPTIDE_N_REGION': 1, 'SIGNAL_PEPTIDE_H_REGION': 1, 'NON_CYTOPLASMIC_DOMAIN': 1, 'SIGNAL_PEPTIDE': 1, 'SIGNAL_PEPTIDE_C_REGION': 1	-	-	Coil': 1	-	-	-	-	-	-	-	-	-	-	-	-	-	-	-	-	-	-	-	-
ETL89625.1		-	-	Signal peptide region': 1, 'Region of a membrane-bound protein predicted to be outside the membrane, in the extracellular region.': 1, 'Hydrophobic region of a signal peptide.': 1, 'C-terminal region of a signal peptide.': 1, 'N-terminal region of a signal peptide.': 1	SIGNAL_PEPTIDE_N_REGION': 1, 'SIGNAL_PEPTIDE_H_REGION': 1, 'NON_CYTOPLASMIC_DOMAIN': 1, 'SIGNAL_PEPTIDE': 1, 'SIGNAL_PEPTIDE_C_REGION': 1	-	-	-	-	-	-	-	-	-	-	-	-	-	-	-	-	-	-	-	-	-	-	-
ETL89629.1		-	-	Signal peptide region': 1, 'Region of a membrane-bound protein predicted to be outside the membrane, in the extracellular region.': 1, 'Hydrophobic region of a signal peptide.': 1, 'C-terminal region of a signal peptide.': 1, 'N-terminal region of a signal peptide.': 1	SIGNAL_PEPTIDE_N_REGION': 1, 'SIGNAL_PEPTIDE_H_REGION': 1, 'NON_CYTOPLASMIC_DOMAIN': 1, 'SIGNAL_PEPTIDE': 1, 'SIGNAL_PEPTIDE_C_REGION': 1	-	-	-	-	-	-	-	-	-	-	-	-	-	-	-	-	-	-	-	-	-	-	-
ETL89852.1		-	-	Signal peptide region': 1, 'Region of a membrane-bound protein predicted to be outside the membrane, in the extracellular region.': 1, 'Hydrophobic region of a signal peptide.': 1, 'C-terminal region of a signal peptide.': 1, 'N-terminal region of a signal peptide.': 1	SIGNAL_PEPTIDE_N_REGION': 1, 'SIGNAL_PEPTIDE_H_REGION': 1, 'NON_CYTOPLASMIC_DOMAIN': 1, 'SIGNAL_PEPTIDE': 1, 'SIGNAL_PEPTIDE_C_REGION': 1	-	-	Coil': 1	-	-	-	-	consensus disorder prediction': 1	mobidb-lite': 1	-	-	-	-	-	-	-	-	-	-	-	-	-	-
ETM01265.1		-	-	Signal peptide region': 1, 'Region of a membrane-bound protein predicted to be outside the membrane, in the extracellular region.': 1, 'Hydrophobic region of a signal peptide.': 1, 'C-terminal region of a signal peptide.': 1, 'N-terminal region of a signal peptide.': 1	SIGNAL_PEPTIDE_N_REGION': 1, 'SIGNAL_PEPTIDE_H_REGION': 1, 'NON_CYTOPLASMIC_DOMAIN': 1, 'SIGNAL_PEPTIDE': 1, 'SIGNAL_PEPTIDE_C_REGION': 1	-	-	-	G3DSA:3.10.20.90': 1	-	-	-	-	-	-	-	-	-	-	-	-	-	-	-	-	-	-	-
ETL85420.1	LDEFLAK	-	-	-	-	-	-	-	-	-	-	-	consensus disorder prediction': 1	mobidb-lite': 1	-	-	-	-	-	-	-	-	-	-	-	-	-	-
ETL86436.1	LQLVLAK	-	-	-	-	-	-	-	-	GO:0003677': 1	Homeobox domain-like': 1	IPR009057': 1	-	-	-	-	-	-	-	-	-	-	-	-	SSF46689': 1	-	-	-
ETL91323.1	LQLLLAK
ETL91415.1	LHLFLAK
ETL91669.1	LQLFLAR
ETL98924.1	LKLFLPK	-	-	-	-	-	-	Coil': 1	G3DSA:3.40.50.300': 1	-	-	-	-	-	-	-	-	-	-	-	-	-	-	-	-	-	-	-
ETL99448.1	LELFLAR
ETM00323.1	LELFLAR
ETM01856.1		-	SignalP-TM': 1	-	-	-	-	-	-	-	-	-	-	-	-	-	-	-	-	-	-	-	-	-	-	-	-	-
ETL79237.1
ETL79238.1
ETL79721.1
ETL80370.1
ETL80371.1		-	-	-	-	Fer4_NifH': 1	cd01983': 1	Coil': 1	G3DSA:3.40.50.300': 2	-	P-loop containing nucleoside triphosphate hydrolase': 2	IPR027417': 2	-	-	-	-	-	-	-	-	-	-	-	-	SSF52540': 2	-	-	-
ETL80590.1
ETL81487.1		-	-	-	-	-	-	-	G3DSA:3.40.50.300': 1	GO:0017183': 2	Diphthamide synthesis DPH1/DPH2': 4, 'P-loop containing nucleoside triphosphate hydrolase': 2, 'Diphthamide synthesis DHP2, eukaryotic': 2	IPR016435': 4, 'IPR010014': 2, 'IPR027417': 2	-	-	PTHR10762:SF3': 1, 'PTHR10762': 1	Putative diphthamide synthesis protein': 1	PF01866': 1	-	-	-	-	Diphthamide biosynthesis': 1, 'Radical SAM 3-amino-3-carboxypropyl Radical Forming': 1	SFLDS00032': 1, 'SFLDG01121': 1	-	SSF52540': 2	diphth2_R: diphthamide biosynthesis enzyme Dph1/Dph2 domain': 1, 'DPH2: diphthamide biosynthesis protein 2': 1	TIGR00272': 1, 'TIGR00322': 1	-
ETL81886.1
ETL82153.1
ETL82431.1
ETL83030.1
ETL83493.1		-	-	-	-	-	-	-	G3DSA:3.90.1200.10': 1	-	Protein kinase-like domain': 1, 'Aminoglycoside phosphotransferase': 1	IPR011009': 1, 'IPR002575': 1	-	-	-	Phosphotransferase enzyme family': 1	PF01636': 1	-	-	-	-	-	-	-	SSF56112': 1	-	-	-
ETL83498.1
ETL84181.1
ETL85464.1
ETL85626.1		-	-	-	-	-	-	-	G3DSA:3.10.20.90': 1	-	-	-	consensus disorder prediction': 1	mobidb-lite': 1	-	-	-	-	-	-	-	-	-	-	-	-	-	-
ETL86479.1
ETL86488.1		-	-	-	-	-	-	Coil': 1	-	-	-	-	-	-	-	-	-	-	-	-	-	-	-	-	-	-	-	-
ETL86659.1
ETL87056.1
ETL88713.1
ETL89209.1		-	-	-	-	AAA': 1	cd00009': 1	-	G3DSA:3.40.50.300': 1	-	P-loop containing nucleoside triphosphate hydrolase': 1	IPR027417': 1	-	-	PTHR33129': 1	-	-	-	-	-	-	-	-	-	SSF52540': 1	-	-	-
ETL89628.1
ETL90108.1
ETL91538.1
ETL92751.1		-	-	-	-	-	-	-	-	-	-	-	consensus disorder prediction': 1	mobidb-lite': 1	-	-	-	-	-	-	-	-	-	-	-	-	-	-
ETL93800.1
ETL93806.1		-	-	-	-	-	-	-	-	-	-	-	consensus disorder prediction': 1	mobidb-lite': 1	-	-	-	-	-	-	-	-	-	-	-	-	-	-
ETL94510.1
ETL94768.1		-	-	-	-	PKc': 1	cd00180': 1	-	G3DSA:1.10.510.10': 1	GO:0004672|GO:0005524|GO:0006468': 2	Protein kinase domain': 2, 'Protein kinase-like domain': 1	IPR000719': 2, 'IPR011009': 1	-	-	PTHR23139': 1, 'PTHR23139:SF93': 1	Protein kinase domain': 1	PF00069': 1	-	-	Protein kinase domain profile.': 1	PS50011': 1	-	-	-	SSF56112': 1	-	-	-
ETL95568.1
ETL96413.1		-	-	-	-	-	-	Coil': 1	G3DSA:3.40.50.300': 1	-	-	-	-	-	-	-	-	-	-	-	-	-	-	-	-	-	-	-
ETL98088.1		-	-	-	-	-	-	-	G3DSA:3.40.50.300': 1	-	P-loop containing nucleoside triphosphate hydrolase': 1	IPR027417': 1	-	-	-	-	-	-	-	-	-	-	-	-	SSF52540': 1	-	-	-
ETL98400.1		-	-	-	-	-	-	-	-	-	Protein kinase-like domain': 1	IPR011009': 1	-	-	-	-	-	-	-	-	-	-	-	-	SSF56112': 1	-	-	-
ETL98527.1
ETL99485.1
ETL99534.1		-	-	-	-	-	-	-	-	-	-	-	consensus disorder prediction': 1	mobidb-lite': 1	-	-	-	-	-	-	-	-	-	-	-	-	-	-
ETL99636.1
ETL99962.1		-	-	-	-	-	-	-	G3DSA:3.40.50.300': 1	-	P-loop containing nucleoside triphosphate hydrolase': 2	IPR027417': 2	-	-	-	-	-	-	-	-	-	-	-	-	SSF52540': 2	-	-	-
ETM00565.1
ETM00566.1
ETM00809.1		-	-	-	-	PKc': 1	cd00180': 1	-	G3DSA:1.10.510.10': 2	GO:0004672|GO:0005524|GO:0006468': 2	Protein kinase domain': 2, 'Protein kinase-like domain': 1	IPR000719': 2, 'IPR011009': 1	-	-	PTHR23139': 1, 'PTHR23139:SF93': 1	Protein kinase domain': 1	PF00069': 1	-	-	Protein kinase domain profile.': 1	PS50011': 1	-	-	-	SSF56112': 1	-	-	-
ETM01260.1		-	-	-	-	-	-	-	G3DSA:1.10.510.10': 1	-	Protein kinase-like domain': 1	IPR011009': 1	-	-	PTHR23139': 1, 'PTHR23139:SF77': 1	-	-	-	-	-	-	-	-	-	SSF56112': 1	-	-	-
ETM01277.1		-	-	-	-	AAA': 1	cd00009': 1	-	G3DSA:3.40.50.300': 1	-	P-loop containing nucleoside triphosphate hydrolase': 1	IPR027417': 1	-	-	PTHR33129': 1	-	-	-	-	-	-	-	-	-	SSF52540': 1	-	-	-
ETM02117.1
ETM02335.1		-	-	-	-	-	-	-	G3DSA:1.10.510.10': 2	-	Protein kinase-like domain': 1	IPR011009': 1	-	-	PTHR33129': 1	-	-	-	-	-	-	-	-	-	SSF56112': 1	-	-	-
ETL92341.1		-	-	Region of a membrane-bound protein predicted to be embedded in the membrane.': 1, 'Region of a membrane-bound protein predicted to be outside the membrane, in the extracellular region.': 1, 'Region of a membrane-bound protein predicted to be outside the membrane, in the cytoplasm.': 1	TRANSMEMBRANE': 1, 'NON_CYTOPLASMIC_DOMAIN': 1, 'CYTOPLASMIC_DOMAIN': 1	-	-	-	G3DSA:3.30.200.20': 1, 'G3DSA:1.10.510.10': 1	GO:0004672|GO:0005524|GO:0006468': 3, 'GO:0004672|GO:0006468': 1	Protein kinase domain': 3, 'Protein kinase-like domain': 1, 'Serine/threonine-protein kinase, active site': 1, 'Calcium/calmodulin-dependent/calcium-dependent protein kinase': 1	IPR000719': 3, 'IPR008271': 1, 'IPR020636': 1, 'IPR011009': 1	-	-	PTHR24347:SF300': 1, 'PTHR24347': 1	Protein kinase domain': 1	PF00069': 1	Serine/Threonine protein kinases active-site signature.': 1	PS00108': 1	Protein kinase domain profile.': 1	PS50011': 1	-	-	SM00220': 1	SSF56112': 1	-	-	-
ETL96889.1		-	-	Region of a membrane-bound protein predicted to be embedded in the membrane.': 1, 'Region of a membrane-bound protein predicted to be outside the membrane, in the extracellular region.': 1, 'Region of a membrane-bound protein predicted to be outside the membrane, in the cytoplasm.': 1	TRANSMEMBRANE': 1, 'NON_CYTOPLASMIC_DOMAIN': 1, 'CYTOPLASMIC_DOMAIN': 1	-	-	-	-	-	-	-	-	-	-	-	-	-	-	-	-	-	-	-	-	-	-	-
ETL87301.1		-	-	Region of a membrane-bound protein predicted to be embedded in the membrane.': 2, 'Region of a membrane-bound protein predicted to be outside the membrane, in the extracellular region.': 2, 'Region of a membrane-bound protein predicted to be outside the membrane, in the cytoplasm.': 1	TRANSMEMBRANE': 2, 'NON_CYTOPLASMIC_DOMAIN': 2, 'CYTOPLASMIC_DOMAIN': 1	-	-	-	G3DSA:3.30.420.10': 1	GO:0003676': 1	Ribonuclease H-like domain': 1	IPR012337': 1	-	-	PTHR33129': 1	-	-	-	-	-	-	-	-	-	-	-	-	TMhelix': 1
ETL91588.1		-	-	Region of a membrane-bound protein predicted to be embedded in the membrane.': 1, 'Region of a membrane-bound protein predicted to be outside the membrane, in the extracellular region.': 1, 'Region of a membrane-bound protein predicted to be outside the membrane, in the cytoplasm.': 1	TRANSMEMBRANE': 1, 'NON_CYTOPLASMIC_DOMAIN': 1, 'CYTOPLASMIC_DOMAIN': 1	-	-	Coil': 1	-	-	-	-	-	-	-	-	-	-	-	-	-	-	-	-	-	-	-	TMhelix': 1
ETL98175.1		-	-	Region of a membrane-bound protein predicted to be embedded in the membrane.': 1, 'Region of a membrane-bound protein predicted to be outside the membrane, in the extracellular region.': 1, 'Region of a membrane-bound protein predicted to be outside the membrane, in the cytoplasm.': 1	TRANSMEMBRANE': 1, 'NON_CYTOPLASMIC_DOMAIN': 1, 'CYTOPLASMIC_DOMAIN': 1	-	-	-	G3DSA:3.40.50.300': 1	-	-	-	-	-	PTHR33129': 1	-	-	-	-	-	-	-	-	-	-	-	-	TMhelix': 1
	18

## Sheet: CJ01A1_candidate Cinkler
Protein	LXLFLAK Domain	SignalP_EUK_Description	SignalP_GRAM_POSITIVE_Description	Phobius_Description	Phobius_ID	CDD_Description	CDD_ID	Coils	Gene3D	GO_terms	IPR_Description	IPR_ID	MobiDBLite_Description	MobiDBLite_ID	PANTHER_Description	Pfam_Description	Pfam_ID	ProSitePatterns_Description	ProSitePatterns_ID	ProSiteProfiles_Description	ProSiteProfiles_ID	SFLD_Description	SFLD_ID	SMART	SUPERFAMILY	TIGRFAM_Description	TIGRFAM_ID	TMHMM
ETP01797.1	LKLYLAK	SignalP-noTM': 1	-	Region of a membrane-bound protein predicted to be outside the membrane, in the extracellular region.': 1, 'Hydrophobic region of a signal peptide.': 1, 'N-terminal region of a signal peptide.': 1, 'C-terminal region of a signal peptide.': 1, 'Signal peptide region': 1	SIGNAL_PEPTIDE_N_REGION': 1, 'SIGNAL_PEPTIDE_H_REGION': 1, 'SIGNAL_PEPTIDE': 1, 'NON_CYTOPLASMIC_DOMAIN': 1, 'SIGNAL_PEPTIDE_C_REGION': 1	-	-	-	-	-	-	-	-	-	-	-	-	-	-	-	-	-	-	-	-	-	-	-
ETP05316.1	MNLFLAK	SignalP-noTM': 1	-	Region of a membrane-bound protein predicted to be outside the membrane, in the extracellular region.': 1, 'Hydrophobic region of a signal peptide.': 1, 'N-terminal region of a signal peptide.': 1, 'C-terminal region of a signal peptide.': 1, 'Signal peptide region': 1	SIGNAL_PEPTIDE_N_REGION': 1, 'SIGNAL_PEPTIDE_C_REGION': 1, 'SIGNAL_PEPTIDE': 1, 'NON_CYTOPLASMIC_DOMAIN': 1, 'SIGNAL_PEPTIDE_H_REGION': 1	-	-	-	G3DSA:3.10.20.90': 1	-	-	-	-	-	-	-	-	-	-	-	-	-	-	-	-	-	-	-
ETP12954.1	LRLFLAR	SignalP-noTM': 1	-	Region of a membrane-bound protein predicted to be outside the membrane, in the extracellular region.': 1, 'Hydrophobic region of a signal peptide.': 1, 'N-terminal region of a signal peptide.': 1, 'Signal peptide region': 1, 'C-terminal region of a signal peptide.': 1	SIGNAL_PEPTIDE_N_REGION': 1, 'SIGNAL_PEPTIDE_H_REGION': 1, 'SIGNAL_PEPTIDE': 1, 'NON_CYTOPLASMIC_DOMAIN': 1, 'SIGNAL_PEPTIDE_C_REGION': 1	-	-	Coil': 1	G3DSA:3.10.20.90': 1	-	-	-	consensus disorder prediction': 1	mobidb-lite': 1	-	-	-	-	-	-	-	-	-	-	-	-	-	-
ETP22928.1	LQPFLAK	SignalP-noTM': 1	-	-	-	-	-	-	-	-	-	-	-	-	-	-	-	-	-	-	-	-	-	-	-	-	-	-
ETP01866.1	LQLFLAK	-	-	Region of a membrane-bound protein predicted to be outside the membrane, in the extracellular region.': 1, 'Hydrophobic region of a signal peptide.': 1, 'N-terminal region of a signal peptide.': 1, 'C-terminal region of a signal peptide.': 1, 'Signal peptide region': 1	SIGNAL_PEPTIDE_N_REGION': 1, 'SIGNAL_PEPTIDE_C_REGION': 1, 'SIGNAL_PEPTIDE': 1, 'NON_CYTOPLASMIC_DOMAIN': 1, 'SIGNAL_PEPTIDE_H_REGION': 1	-	-	-	-	-	-	-	-	-	PTHR33129': 1	-	-	-	-	-	-	-	-	-	-	-	-	-
ETP03271.1	LQLYLAK	-	-	Region of a membrane-bound protein predicted to be outside the membrane, in the extracellular region.': 1, 'Hydrophobic region of a signal peptide.': 1, 'N-terminal region of a signal peptide.': 1, 'Signal peptide region': 1, 'C-terminal region of a signal peptide.': 1	SIGNAL_PEPTIDE_N_REGION': 1, 'SIGNAL_PEPTIDE_H_REGION': 1, 'SIGNAL_PEPTIDE': 1, 'NON_CYTOPLASMIC_DOMAIN': 1, 'SIGNAL_PEPTIDE_C_REGION': 1	-	-	-	-	-	-	-	-	-	-	-	-	-	-	-	-	-	-	-	-	-	-	-
ETP14964.1	LQLFLAR	-	-	Region of a membrane-bound protein predicted to be outside the membrane, in the extracellular region.': 1, 'Hydrophobic region of a signal peptide.': 1, 'N-terminal region of a signal peptide.': 1, 'Signal peptide region': 1, 'C-terminal region of a signal peptide.': 1	SIGNAL_PEPTIDE_N_REGION': 1, 'SIGNAL_PEPTIDE_H_REGION': 1, 'SIGNAL_PEPTIDE': 1, 'NON_CYTOPLASMIC_DOMAIN': 1, 'SIGNAL_PEPTIDE_C_REGION': 1	-	-	-	-	-	-	-	-	-	-	-	-	-	-	-	-	-	-	-	-	-	-	-
ETP18531.1	LSLFLAK	-	-	Region of a membrane-bound protein predicted to be outside the membrane, in the extracellular region.': 1, 'Hydrophobic region of a signal peptide.': 1, 'N-terminal region of a signal peptide.': 1, 'C-terminal region of a signal peptide.': 1, 'Signal peptide region': 1	SIGNAL_PEPTIDE_N_REGION': 1, 'SIGNAL_PEPTIDE_C_REGION': 1, 'SIGNAL_PEPTIDE': 1, 'NON_CYTOPLASMIC_DOMAIN': 1, 'SIGNAL_PEPTIDE_H_REGION': 1	-	-	-	-	-	-	-	-	-	-	-	-	-	-	-	-	-	-	-	-	-	-	-
ETP23005.1	LRLFLTK	-	-	Region of a membrane-bound protein predicted to be outside the membrane, in the extracellular region.': 1, 'Hydrophobic region of a signal peptide.': 1, 'N-terminal region of a signal peptide.': 1, 'C-terminal region of a signal peptide.': 1, 'Signal peptide region': 1	SIGNAL_PEPTIDE_N_REGION': 1, 'SIGNAL_PEPTIDE_C_REGION': 1, 'SIGNAL_PEPTIDE': 1, 'NON_CYTOPLASMIC_DOMAIN': 1, 'SIGNAL_PEPTIDE_H_REGION': 1	-	-	-	G3DSA:3.10.20.90': 1	-	-	-	-	-	PTHR33129': 1	-	-	-	-	-	-	-	-	-	-	-	-	-
ETP24767.1	LRLFLAK	-	-	Region of a membrane-bound protein predicted to be outside the membrane, in the extracellular region.': 1, 'Hydrophobic region of a signal peptide.': 1, 'N-terminal region of a signal peptide.': 1, 'C-terminal region of a signal peptide.': 1, 'Signal peptide region': 1	SIGNAL_PEPTIDE_N_REGION': 1, 'SIGNAL_PEPTIDE_C_REGION': 1, 'SIGNAL_PEPTIDE': 1, 'NON_CYTOPLASMIC_DOMAIN': 1, 'SIGNAL_PEPTIDE_H_REGION': 1	-	-	-	G3DSA:3.30.200.20': 1, 'G3DSA:3.90.1200.10': 1	GO:0005524': 1	Protein kinase-like domain': 1, 'Protein kinase, ATP binding site': 1	IPR011009': 1, 'IPR017441': 1	-	-	-	-	-	Protein kinases ATP-binding region signature.': 1	PS00107': 1	-	-	-	-	-	SSF56112': 1	-	-	-
ETP25357.1	LQLFLAK	-	-	Region of a membrane-bound protein predicted to be outside the membrane, in the extracellular region.': 1, 'Hydrophobic region of a signal peptide.': 1, 'N-terminal region of a signal peptide.': 1, 'Signal peptide region': 1, 'C-terminal region of a signal peptide.': 1	SIGNAL_PEPTIDE_N_REGION': 1, 'SIGNAL_PEPTIDE_H_REGION': 1, 'SIGNAL_PEPTIDE': 1, 'NON_CYTOPLASMIC_DOMAIN': 1, 'SIGNAL_PEPTIDE_C_REGION': 1	-	-	-	-	-	-	-	-	-	-	-	-	-	-	-	-	-	-	-	-	-	-	-
ETP25969.1	LQLFLAR	-	-	Region of a membrane-bound protein predicted to be outside the membrane, in the extracellular region.': 1, 'N-terminal region of a signal peptide.': 1, 'Region of a membrane-bound protein predicted to be outside the membrane, in the cytoplasm.': 1, 'Region of a membrane-bound protein predicted to be embedded in the membrane.': 1, 'Hydrophobic region of a signal peptide.': 1, 'Signal peptide regio…	SIGNAL_PEPTIDE_C_REGION': 1, 'TRANSMEMBRANE': 1, 'SIGNAL_PEPTIDE': 1, 'NON_CYTOPLASMIC_DOMAIN': 1, 'CYTOPLASMIC_DOMAIN': 1, 'SIGNAL_PEPTIDE_N_REGION': 1, 'SIGNAL_PEPTIDE_H_REGION': 1	ABC_ATPase': 1	cd00267': 1	-	G3DSA:3.40.50.300': 1	-	-	-	-	-	PTHR33129': 1	-	-	-	-	-	-	-	-	-	-	-	-	TMhelix': 1
ETP24026.1		SignalP-noTM': 1	SignalP-TM': 1	Region of a membrane-bound protein predicted to be outside the membrane, in the extracellular region.': 1, 'Hydrophobic region of a signal peptide.': 1, 'N-terminal region of a signal peptide.': 1, 'C-terminal region of a signal peptide.': 1, 'Signal peptide region': 1	SIGNAL_PEPTIDE_N_REGION': 1, 'SIGNAL_PEPTIDE_C_REGION': 1, 'SIGNAL_PEPTIDE': 1, 'NON_CYTOPLASMIC_DOMAIN': 1, 'SIGNAL_PEPTIDE_H_REGION': 1	-	-	-	G3DSA:3.10.20.90': 1	-	-	-	-	-	-	-	-	-	-	-	-	-	-	-	-	-	-	-
ETP08437.1		-	-	Region of a membrane-bound protein predicted to be outside the membrane, in the extracellular region.': 1, 'Hydrophobic region of a signal peptide.': 1, 'N-terminal region of a signal peptide.': 1, 'Signal peptide region': 1, 'C-terminal region of a signal peptide.': 1	SIGNAL_PEPTIDE_N_REGION': 1, 'SIGNAL_PEPTIDE_H_REGION': 1, 'SIGNAL_PEPTIDE': 1, 'NON_CYTOPLASMIC_DOMAIN': 1, 'SIGNAL_PEPTIDE_C_REGION': 1	-	-	-	-	-	-	-	-	-	-	-	-	-	-	-	-	-	-	-	-	-	-	-
ETP09504.1		-	-	Region of a membrane-bound protein predicted to be outside the membrane, in the extracellular region.': 1, 'Hydrophobic region of a signal peptide.': 1, 'N-terminal region of a signal peptide.': 1, 'C-terminal region of a signal peptide.': 1, 'Signal peptide region': 1	SIGNAL_PEPTIDE_N_REGION': 1, 'SIGNAL_PEPTIDE_H_REGION': 1, 'SIGNAL_PEPTIDE': 1, 'NON_CYTOPLASMIC_DOMAIN': 1, 'SIGNAL_PEPTIDE_C_REGION': 1	-	-	Coil': 1	-	-	-	-	-	-	-	-	-	-	-	-	-	-	-	-	-	-	-	-
ETP08438.1	LDEFLAK
ETP14705.1	LHLFLAK
ETP16418.1	LKLFLAV
ETP17097.1	LHLFLAQ
ETP22300.1	LKLFLVK	-	-	-	-	-	-	-	-	-	-	-	consensus disorder prediction': 1	mobidb-lite': 1	-	-	-	-	-	-	-	-	-	-	-	-	-	-
ETP22845.1	LELFLAR
ETP22929.1	LQLLLAK	-	-	-	-	-	-	-	-	-	-	-	-	-	PTHR33129': 1	-	-	-	-	-	-	-	-	-	-	-	-	-
ETP23769.1	LELFLAR
ETP24751.1	LELFLAR	-	-	-	-	AAA': 1	cd00009': 1	Coil': 1	G3DSA:3.40.50.300': 2	-	P-loop containing nucleoside triphosphate hydrolase': 1	IPR027417': 1	-	-	PTHR33129': 1	-	-	-	-	-	-	-	-	-	SSF52540': 1	-	-	-
ETP25783.1	MQLFLAK
ETO99743.1
ETO99760.1
ETP00001.1		-	-	-	-	-	-	-	-	-	P-loop containing nucleoside triphosphate hydrolase': 1	IPR027417': 1	consensus disorder prediction': 1	mobidb-lite': 1	PTHR33129': 1	-	-	-	-	-	-	-	-	-	SSF52540': 1	-	-	-
ETP00129.1		-	-	-	-	PKc': 1	cd00180': 1	-	G3DSA:1.10.510.10': 2	GO:0004672|GO:0005524|GO:0006468': 2	Protein kinase domain': 2, 'Protein kinase-like domain': 1	IPR000719': 2, 'IPR011009': 1	-	-	PTHR23139': 1, 'PTHR23139:SF93': 1	Protein kinase domain': 1	PF00069': 1	-	-	Protein kinase domain profile.': 1	PS50011': 1	-	-	-	SSF56112': 1	-	-	-
ETP02067.1
ETP02068.1
ETP02779.1
ETP03262.1
ETP03410.1
ETP04373.1
ETP04374.1
ETP05045.1
ETP05314.1
ETP05353.1
ETP05913.1
ETP06435.1		-	-	-	-	-	-	-	G3DSA:3.40.50.300': 1	-	P-loop containing nucleoside triphosphate hydrolase': 1	IPR027417': 1	-	-	PTHR33129': 1	AAA-like domain': 1	PF14516': 1	-	-	-	-	-	-	-	SSF52540': 1	-	-	-
ETP06437.1		-	-	-	-	-	-	-	G3DSA:3.90.1200.10': 1	-	Protein kinase-like domain': 1, 'Aminoglycoside phosphotransferase': 1	IPR011009': 1, 'IPR002575': 1	-	-	-	Phosphotransferase enzyme family': 1	PF01636': 1	-	-	-	-	-	-	-	SSF56112': 1	-	-	-
ETP06442.1
ETP07100.1
ETP07179.1
ETP08481.1
ETP08673.1
ETP09509.1
ETP09536.1		-	-	-	-	-	-	Coil': 1	-	-	-	-	-	-	-	-	-	-	-	-	-	-	-	-	-	-	-	-
ETP09672.1
ETP10938.1		-	-	-	-	-	-	-	-	-	Peptidase S1, PA clan': 2	IPR009003': 2	consensus disorder prediction': 1	mobidb-lite': 1	-	-	-	-	-	-	-	-	-	-	SSF50494': 2	-	-	-
ETP12275.1		-	-	-	-	AAA': 1	cd00009': 1	-	G3DSA:3.40.50.300': 1	-	P-loop containing nucleoside triphosphate hydrolase': 1	IPR027417': 1	-	-	PTHR33129': 1	-	-	-	-	-	-	-	-	-	SSF52540': 1	-	-	-
ETP12752.1
ETP12753.1
ETP16075.1		-	-	-	-	-	-	-	-	-	-	-	consensus disorder prediction': 1	mobidb-lite': 1	-	-	-	-	-	-	-	-	-	-	-	-	-	-
ETP17861.1
ETP18383.1		-	-	-	-	-	-	-	G3DSA:3.90.1200.10': 1	GO:0004672|GO:0006468': 1	Protein kinase-like domain': 1, 'Tyrosine-protein kinase, active site': 1	IPR011009': 1, 'IPR008266': 1	-	-	-	-	-	Tyrosine protein kinases specific active-site signature.': 1	PS00109': 1	-	-	-	-	-	SSF56112': 1	-	-	-
ETP18872.1
ETP21483.1
ETP21783.1
ETP21862.1		-	-	-	-	-	-	-	G3DSA:3.10.20.90': 2	-	-	-	-	-	-	-	-	-	-	-	-	-	-	-	-	-	-	-
ETP21888.1		-	-	-	-	ANK': 1	cd00204': 1	-	G3DSA:1.25.40.20': 2	-	Ankyrin repeat-containing domain': 3	IPR020683': 3	-	-	-	-	-	-	-	-	-	-	-	-	SSF48403': 1	-	-	-
ETP22834.1
ETP23006.1		-	-	-	-	-	-	-	-	-	-	-	-	-	PTHR33129': 1	-	-	-	-	-	-	-	-	-	-	-	-	-
ETP23019.1
ETP23020.1
ETP23400.1		-	-	-	-	-	-	-	G3DSA:3.40.50.300': 1	-	P-loop containing nucleoside triphosphate hydrolase': 2	IPR027417': 2	-	-	-	-	-	-	-	-	-	-	-	-	SSF52540': 2	-	-	-
ETP23552.1
ETP23553.1
ETP23554.1
ETP23770.1		-	-	-	-	PKc': 1	cd00180': 1	-	G3DSA:1.10.510.10': 1, 'G3DSA:3.30.200.20': 1	-	Protein kinase-like domain': 1	IPR011009': 1	-	-	-	-	-	-	-	-	-	-	-	-	SSF56112': 1	-	-	-
ETP24024.1
ETP24025.1
ETP24291.1		-	-	-	-	PKc': 1	cd00180': 1	-	G3DSA:1.10.510.10': 2	GO:0004672|GO:0005524|GO:0006468': 2	Protein kinase domain': 2, 'Protein kinase-like domain': 1	IPR000719': 2, 'IPR011009': 1	-	-	PTHR23139': 1, 'PTHR23139:SF93': 1	Protein kinase domain': 1	PF00069': 1	-	-	Protein kinase domain profile.': 1	PS50011': 1	-	-	-	SSF56112': 1	-	-	-
ETP24333.1
ETP24335.1
ETP24336.1
ETP24745.1		-	-	-	-	-	-	-	G3DSA:1.10.510.10': 1	-	Protein kinase-like domain': 1	IPR011009': 1	-	-	PTHR23139': 1, 'PTHR23139:SF77': 1	-	-	-	-	-	-	-	-	-	SSF56112': 1	-	-	-
ETP24753.1		-	-	-	-	-	-	-	G3DSA:3.30.200.20': 1, 'G3DSA:3.90.1200.10': 1	GO:0005524': 1	Protein kinase-like domain': 1, 'Protein kinase, ATP binding site': 1	IPR011009': 1, 'IPR017441': 1	-	-	-	-	-	Protein kinases ATP-binding region signature.': 1	PS00107': 1	-	-	-	-	-	SSF56112': 1	-	-	-
ETP25413.1
ETP25414.1		-	-	-	-	NK': 1	cd02019': 1	-	G3DSA:3.40.50.300': 1	-	P-loop containing nucleoside triphosphate hydrolase': 1	IPR027417': 1	-	-	-	-	-	-	-	-	-	-	-	-	SSF52540': 1	-	-	-
ETP25675.1
ETP25903.1		-	-	-	-	-	-	-	G3DSA:1.10.510.10': 2	-	Protein kinase-like domain': 1	IPR011009': 1	-	-	PTHR23139': 1, 'PTHR23139:SF93': 1	-	-	-	-	-	-	-	-	-	SSF56112': 1	-	-	-
ETP26911.1	LRLFLAK	-	-	Region of a membrane-bound protein predicted to be outside the membrane, in the extracellular region.': 1, 'Region of a membrane-bound protein predicted to be embedded in the membrane.': 1, 'Region of a membrane-bound protein predicted to be outside the membrane, in the cytoplasm.': 1	TRANSMEMBRANE': 1, 'NON_CYTOPLASMIC_DOMAIN': 1, 'CYTOPLASMIC_DOMAIN': 1	-	-	-	-	-	HNH nuclease': 1	IPR003615': 1	-	-	-	HNH endonuclease': 1	PF13391': 1	-	-	-	-	-	-	-	-	-	-	-
ETP03215.1		-	-	Region of a membrane-bound protein predicted to be outside the membrane, in the extracellular region.': 1, 'Region of a membrane-bound protein predicted to be embedded in the membrane.': 1, 'Region of a membrane-bound protein predicted to be outside the membrane, in the cytoplasm.': 1	TRANSMEMBRANE': 1, 'NON_CYTOPLASMIC_DOMAIN': 1, 'CYTOPLASMIC_DOMAIN': 1	-	-	-	-	-	-	-	-	-	-	-	-	-	-	-	-	-	-	-	-	-	-	TMhelix': 1
ETP10276.1		-	-	Region of a membrane-bound protein predicted to be embedded in the membrane.': 2, 'Region of a membrane-bound protein predicted to be outside the membrane, in the extracellular region.': 2, 'Region of a membrane-bound protein predicted to be outside the membrane, in the cytoplasm.': 1	TRANSMEMBRANE': 2, 'NON_CYTOPLASMIC_DOMAIN': 2, 'CYTOPLASMIC_DOMAIN': 1	-	-	-	G3DSA:3.30.420.10': 1	GO:0003676': 1	Ribonuclease H-like domain': 1	IPR012337': 1	-	-	PTHR33129': 1	-	-	-	-	-	-	-	-	-	-	-	-	TMhelix': 1
ETP14888.1		-	-	Region of a membrane-bound protein predicted to be embedded in the membrane.': 1, 'Region of a membrane-bound protein predicted to be outside the membrane, in the extracellular region.': 1, 'Region of a membrane-bound protein predicted to be outside the membrane, in the cytoplasm.': 1	TRANSMEMBRANE': 1, 'NON_CYTOPLASMIC_DOMAIN': 1, 'CYTOPLASMIC_DOMAIN': 1	-	-	Coil': 2	-	-	-	-	-	-	-	-	-	-	-	-	-	-	-	-	-	-	-	TMhelix': 1
ETP15664.1		-	-	Region of a membrane-bound protein predicted to be embedded in the membrane.': 1, 'Region of a membrane-bound protein predicted to be outside the membrane, in the extracellular region.': 1, 'Region of a membrane-bound protein predicted to be outside the membrane, in the cytoplasm.': 1	TRANSMEMBRANE': 1, 'NON_CYTOPLASMIC_DOMAIN': 1, 'CYTOPLASMIC_DOMAIN': 1	-	-	-	G3DSA:1.10.510.10': 1, 'G3DSA:3.30.200.20': 1	GO:0004672|GO:0005524|GO:0006468': 3, 'GO:0004672|GO:0006468': 1	Protein kinase domain': 3, 'Serine/threonine-protein kinase, active site': 1, 'Protein kinase-like domain': 1, 'Calcium/calmodulin-dependent/calcium-dependent protein kinase': 1	IPR000719': 3, 'IPR011009': 1, 'IPR020636': 1, 'IPR008271': 1	-	-	PTHR24347': 1, 'PTHR24347:SF300': 1	Protein kinase domain': 1	PF00069': 1	Serine/Threonine protein kinases active-site signature.': 1	PS00108': 1	Protein kinase domain profile.': 1	PS50011': 1	-	-	SM00220': 1	SSF56112': 1	-	-	-
ETP20230.1		-	-	Region of a membrane-bound protein predicted to be outside the membrane, in the extracellular region.': 1, 'Region of a membrane-bound protein predicted to be embedded in the membrane.': 1, 'Region of a membrane-bound protein predicted to be outside the membrane, in the cytoplasm.': 1	TRANSMEMBRANE': 1, 'NON_CYTOPLASMIC_DOMAIN': 1, 'CYTOPLASMIC_DOMAIN': 1	-	-	-	-	-	-	-	-	-	-	-	-	-	-	-	-	-	-	-	-	-	-	-
ETP21502.1		-	-	Region of a membrane-bound protein predicted to be outside the membrane, in the extracellular region.': 1, 'Region of a membrane-bound protein predicted to be embedded in the membrane.': 1, 'Region of a membrane-bound protein predicted to be outside the membrane, in the cytoplasm.': 1	TRANSMEMBRANE': 1, 'NON_CYTOPLASMIC_DOMAIN': 1, 'CYTOPLASMIC_DOMAIN': 1	-	-	-	G3DSA:3.40.50.300': 1	-	-	-	-	-	PTHR33129': 1	-	-	-	-	-	-	-	-	-	-	-	-	TMhelix': 1
ETP22299.1		-	-	Region of a membrane-bound protein predicted to be outside the membrane, in the extracellular region.': 1, 'Region of a membrane-bound protein predicted to be embedded in the membrane.': 1, 'Region of a membrane-bound protein predicted to be outside the membrane, in the cytoplasm.': 1	TRANSMEMBRANE': 1, 'NON_CYTOPLASMIC_DOMAIN': 1, 'CYTOPLASMIC_DOMAIN': 1	-	-	-	G3DSA:3.40.50.300': 1	-	P-loop containing nucleoside triphosphate hydrolase': 1	IPR027417': 1	-	-	-	-	-	-	-	-	-	-	-	-	SSF52540': 1	-	-	-
ETP24979.1		-	-	Region of a membrane-bound protein predicted to be outside the membrane, in the extracellular region.': 1, 'Region of a membrane-bound protein predicted to be embedded in the membrane.': 1, 'Region of a membrane-bound protein predicted to be outside the membrane, in the cytoplasm.': 1	TRANSMEMBRANE': 1, 'NON_CYTOPLASMIC_DOMAIN': 1, 'CYTOPLASMIC_DOMAIN': 1	Fer4_NifH': 1	cd01983': 1	-	G3DSA:3.40.50.300': 2	-	P-loop containing nucleoside triphosphate hydrolase': 1	IPR027417': 1	consensus disorder prediction': 1	mobidb-lite': 1	-	-	-	-	-	-	-	-	-	-	SSF52540': 1	-	-	TMhelix': 1
	23

## Sheet: CJ02B3_candidate Cinkler
Protein	LXLFLAK Domain	SignalP_EUK_Description	SignalP_GRAM_POSITIVE_Description	Phobius_Description	Phobius_ID	CDD_Description	CDD_ID	Coils	Gene3D	GO_terms	IPR_Description	IPR_ID	MobiDBLite_Description	MobiDBLite_ID	PANTHER_Description	Pfam_Description	Pfam_ID	ProSitePatterns_Description	ProSitePatterns_ID	ProSiteProfiles_Description	ProSiteProfiles_ID	SFLD_Description	SFLD_ID	SMART	SUPERFAMILY	TIGRFAM_Description	TIGRFAM_ID	TMHMM
ETK72306.1	LKLYLAK	SignalP-noTM': 1	-	Region of a membrane-bound protein predicted to be outside the membrane, in the extracellular region.': 1, 'N-terminal region of a signal peptide.': 1, 'Hydrophobic region of a signal peptide.': 1, 'Signal peptide region': 1, 'C-terminal region of a signal peptide.': 1	NON_CYTOPLASMIC_DOMAIN': 1, 'SIGNAL_PEPTIDE_C_REGION': 1, 'SIGNAL_PEPTIDE': 1, 'SIGNAL_PEPTIDE_H_REGION': 1, 'SIGNAL_PEPTIDE_N_REGION': 1	-	-	-	-	-	-	-	-	-	-	-	-	-	-	-	-	-	-	-	-	-	-	-
ETK83251.1	LRLFLAR	SignalP-noTM': 1	-	Region of a membrane-bound protein predicted to be outside the membrane, in the extracellular region.': 1, 'N-terminal region of a signal peptide.': 1, 'Hydrophobic region of a signal peptide.': 1, 'Signal peptide region': 1, 'C-terminal region of a signal peptide.': 1	NON_CYTOPLASMIC_DOMAIN': 1, 'SIGNAL_PEPTIDE_C_REGION': 1, 'SIGNAL_PEPTIDE': 1, 'SIGNAL_PEPTIDE_H_REGION': 1, 'SIGNAL_PEPTIDE_N_REGION': 1	-	-	Coil': 1	G3DSA:3.10.20.90': 1	-	-	-	consensus disorder prediction': 1	mobidb-lite': 1	-	-	-	-	-	-	-	-	-	-	-	-	-	-
ETK94084.1		SignalP-noTM': 1	SignalP-TM': 1	Region of a membrane-bound protein predicted to be outside the membrane, in the extracellular region.': 1, 'N-terminal region of a signal peptide.': 1, 'Hydrophobic region of a signal peptide.': 1, 'Signal peptide region': 1, 'C-terminal region of a signal peptide.': 1	NON_CYTOPLASMIC_DOMAIN': 1, 'SIGNAL_PEPTIDE_C_REGION': 1, 'SIGNAL_PEPTIDE_N_REGION': 1, 'SIGNAL_PEPTIDE_H_REGION': 1, 'SIGNAL_PEPTIDE': 1	-	-	-	G3DSA:3.10.20.90': 1	-	-	-	-	-	-	-	-	-	-	-	-	-	-	-	-	-	-	-
ETK75729.1	MNLFLAK	-	-	Region of a membrane-bound protein predicted to be outside the membrane, in the extracellular region.': 1, 'N-terminal region of a signal peptide.': 1, 'Hydrophobic region of a signal peptide.': 1, 'Signal peptide region': 1, 'C-terminal region of a signal peptide.': 1	NON_CYTOPLASMIC_DOMAIN': 1, 'SIGNAL_PEPTIDE_C_REGION': 1, 'SIGNAL_PEPTIDE_N_REGION': 1, 'SIGNAL_PEPTIDE_H_REGION': 1, 'SIGNAL_PEPTIDE': 1	-	-	-	G3DSA:3.10.20.90': 1	-	-	-	-	-	-	-	-	-	-	-	-	-	-	-	-	-	-	-
ETK79815.1	LDLFLAR	-	-	Region of a membrane-bound protein predicted to be outside the membrane, in the extracellular region.': 1, 'N-terminal region of a signal peptide.': 1, 'Hydrophobic region of a signal peptide.': 1, 'Signal peptide region': 1, 'C-terminal region of a signal peptide.': 1	NON_CYTOPLASMIC_DOMAIN': 1, 'SIGNAL_PEPTIDE_C_REGION': 1, 'SIGNAL_PEPTIDE_H_REGION': 1, 'SIGNAL_PEPTIDE': 1, 'SIGNAL_PEPTIDE_N_REGION': 1	-	-	-	-	-	-	-	-	-	-	-	-	-	-	-	-	-	-	-	-	-	-	-
ETK78746.1		-	-	Region of a membrane-bound protein predicted to be outside the membrane, in the extracellular region.': 1, 'N-terminal region of a signal peptide.': 1, 'Hydrophobic region of a signal peptide.': 1, 'Signal peptide region': 1, 'C-terminal region of a signal peptide.': 1	NON_CYTOPLASMIC_DOMAIN': 1, 'SIGNAL_PEPTIDE_C_REGION': 1, 'SIGNAL_PEPTIDE_H_REGION': 1, 'SIGNAL_PEPTIDE': 1, 'SIGNAL_PEPTIDE_N_REGION': 1	-	-	-	-	-	-	-	-	-	-	-	-	-	-	-	-	-	-	-	-	-	-	-
ETK88661.1	LSLFLAK	-	-	Region of a membrane-bound protein predicted to be outside the membrane, in the extracellular region.': 1, 'N-terminal region of a signal peptide.': 1, 'Hydrophobic region of a signal peptide.': 1, 'Signal peptide region': 1, 'C-terminal region of a signal peptide.': 1	NON_CYTOPLASMIC_DOMAIN': 1, 'SIGNAL_PEPTIDE_C_REGION': 1, 'SIGNAL_PEPTIDE_N_REGION': 1, 'SIGNAL_PEPTIDE_H_REGION': 1, 'SIGNAL_PEPTIDE': 1	-	-	-	-	-	-	-	-	-	-	-	-	-	-	-	-	-	-	-	-	-	-	-
ETK84770.1	LQLLLAK
ETK78747.1	LDEFLAK	-	-	-	-	-	-	-	-	-	-	-	consensus disorder prediction': 1	mobidb-lite': 1	-	-	-	-	-	-	-	-	-	-	-	-	-	-
ETK96895.1	LRLFLAK
ETK86549.1	LKLFLAV
ETK94770.1	LELFLAR	-	-	Region of a membrane-bound protein predicted to be outside the membrane, in the extracellular region.': 1, 'N-terminal region of a signal peptide.': 1, 'Hydrophobic region of a signal peptide.': 1, 'Signal peptide region': 1, 'C-terminal region of a signal peptide.': 1	NON_CYTOPLASMIC_DOMAIN': 1, 'SIGNAL_PEPTIDE_C_REGION': 1, 'SIGNAL_PEPTIDE': 1, 'SIGNAL_PEPTIDE_H_REGION': 1, 'SIGNAL_PEPTIDE_N_REGION': 1	-	-	Coil': 1	-	-	-	-	-	-	-	-	-	-	-	-	-	-	-	-	-	-	-	-
ETK93051.1	LRLFLTK	-	-	Region of a membrane-bound protein predicted to be outside the membrane, in the extracellular region.': 1, 'N-terminal region of a signal peptide.': 1, 'Hydrophobic region of a signal peptide.': 1, 'Signal peptide region': 1, 'C-terminal region of a signal peptide.': 1	NON_CYTOPLASMIC_DOMAIN': 1, 'SIGNAL_PEPTIDE_C_REGION': 1, 'SIGNAL_PEPTIDE_N_REGION': 1, 'SIGNAL_PEPTIDE_H_REGION': 1, 'SIGNAL_PEPTIDE': 1	-	-	-	G3DSA:3.10.20.90': 1	-	-	-	-	-	-	-	-	-	-	-	-	-	-	-	-	-	-	-
ETK95357.1		-	-	Region of a membrane-bound protein predicted to be outside the membrane, in the extracellular region.': 1, 'N-terminal region of a signal peptide.': 1, 'Hydrophobic region of a signal peptide.': 1, 'Signal peptide region': 1, 'C-terminal region of a signal peptide.': 1	NON_CYTOPLASMIC_DOMAIN': 1, 'SIGNAL_PEPTIDE_C_REGION': 1, 'SIGNAL_PEPTIDE_N_REGION': 1, 'SIGNAL_PEPTIDE_H_REGION': 1, 'SIGNAL_PEPTIDE': 1	-	-	-	-	-	-	-	-	-	-	-	-	-	-	-	-	-	-	-	-	-	-	-
ETK94780.1	LELFLAR	-	-	-	-	AAA': 1	cd00009': 1	Coil': 1	G3DSA:3.40.50.300': 2	-	P-loop containing nucleoside triphosphate hydrolase': 1	IPR027417': 1	-	-	PTHR33129': 1	-	-	-	-	-	-	-	-	-	SSF52540': 1	-	-	-
ETK93829.1	LELFLAR
ETK92356.1	LKLFLVK
ETK92893.1	LELFLAR
ETK72569.1
ETK72570.1
ETK73291.1
ETK73753.1		-	-	-	-	-	-	-	-	-	Peptidase S1, PA clan': 2	IPR009003': 2	consensus disorder prediction': 1	mobidb-lite': 1	-	-	-	-	-	-	-	-	-	-	SSF50494': 2	-	-	-
ETK73918.1
ETK74838.1		-	-	-	-	-	-	-	-	GO:0017183': 2	Diphthamide synthesis DPH1/DPH2': 4, 'Diphthamide synthesis DHP2, eukaryotic': 2	IPR016435': 4, 'IPR010014': 2	-	-	PTHR10762:SF3': 1, 'PTHR10762': 1	Putative diphthamide synthesis protein': 1	PF01866': 1	-	-	-	-	Diphthamide biosynthesis': 1, 'Radical SAM 3-amino-3-carboxypropyl Radical Forming': 1	SFLDS00032': 1, 'SFLDG01121': 1	-	-	DPH2: diphthamide biosynthesis protein 2': 1, 'diphth2_R: diphthamide biosynthesis enzyme Dph1/Dph2 domain': 1	TIGR00272': 1, 'TIGR00322': 1	-
ETK75204.1
ETK75371.1
ETK75481.1
ETK75727.1
ETK75765.1
ETK75774.1
ETK76334.1
ETK76841.1		-	-	-	-	-	-	-	G3DSA:3.40.50.300': 1	-	P-loop containing nucleoside triphosphate hydrolase': 1	IPR027417': 1	-	-	PTHR33129': 1	AAA-like domain': 1	PF14516': 1	-	-	-	-	-	-	-	SSF52540': 1	-	-	-
ETK76843.1		-	-	-	-	-	-	-	G3DSA:3.90.1200.10': 1	-	Protein kinase-like domain': 1, 'Aminoglycoside phosphotransferase': 1	IPR002575': 1, 'IPR011009': 1	-	-	-	Phosphotransferase enzyme family': 1	PF01636': 1	-	-	-	-	-	-	-	SSF56112': 1	-	-	-
ETK76848.1
ETK77488.1		-	-	-	-	-	-	Coil': 1	-	-	-	-	-	-	-	-	-	-	-	-	-	-	-	-	-	-	-	-
ETK78778.1
ETK78953.1
ETK78954.1
ETK79800.1
ETK79816.1		-	-	-	-	-	-	Coil': 1	-	-	-	-	-	-	-	-	-	-	-	-	-	-	-	-	-	-	-	-
ETK79965.1
ETK81185.1		-	-	-	-	-	-	-	-	-	P-loop containing nucleoside triphosphate hydrolase': 1	IPR027417': 1	consensus disorder prediction': 1	mobidb-lite': 1	PTHR33129': 1	-	-	-	-	-	-	-	-	-	SSF52540': 1	-	-	-
ETK81202.1		-	-	-	-	-	-	-	-	-	-	-	-	-	PTHR33129': 1	-	-	-	-	-	-	-	-	-	-	-	-	-
ETK82601.1		-	-	-	-	AAA': 1	cd00009': 1	-	G3DSA:3.40.50.300': 1	-	P-loop containing nucleoside triphosphate hydrolase': 1	IPR027417': 1	-	-	PTHR33129': 1	-	-	-	-	-	-	-	-	-	SSF52540': 1	-	-	-
ETK83032.1
ETK83033.1
ETK83529.1
ETK85124.1
ETK86205.1		-	-	-	-	-	-	-	-	-	-	-	consensus disorder prediction': 1	mobidb-lite': 1	-	-	-	-	-	-	-	-	-	-	-	-	-	-
ETK86207.1
ETK88187.1
ETK88188.1
ETK88189.1
ETK88199.1
ETK88523.1
ETK88993.1
ETK89826.1		-	-	-	-	-	-	-	G3DSA:3.40.50.300': 1	-	-	-	-	-	-	-	-	-	-	-	-	-	-	-	-	-	-	-
ETK91524.1
ETK91824.1		-	-	-	-	-	-	-	-	-	Protein kinase-like domain': 1	IPR011009': 1	-	-	-	-	-	-	-	-	-	-	-	-	SSF56112': 1	-	-	-
ETK91946.1
ETK92920.1
ETK92978.1		-	-	-	-	-	-	-	-	-	-	-	consensus disorder prediction': 1	mobidb-lite': 1	-	-	-	-	-	-	-	-	-	-	-	-	-	-
ETK93052.1		-	-	-	-	-	-	-	-	-	-	-	-	-	PTHR33129': 1	-	-	-	-	-	-	-	-	-	-	-	-	-
ETK93076.1
ETK93465.1		-	-	-	-	-	-	-	G3DSA:3.40.50.300': 1	-	P-loop containing nucleoside triphosphate hydrolase': 2	IPR027417': 2	-	-	-	-	-	-	-	-	-	-	-	-	SSF52540': 2	-	-	-
ETK94082.1
ETK94083.1
ETK94324.1		-	-	-	-	PKc': 1	cd00180': 1	-	G3DSA:1.10.510.10': 2	GO:0004672|GO:0005524|GO:0006468': 2	Protein kinase domain': 2, 'Protein kinase-like domain': 1	IPR000719': 2, 'IPR011009': 1	-	-	PTHR23139:SF93': 1, 'PTHR23139': 1	Protein kinase domain': 1	PF00069': 1	-	-	Protein kinase domain profile.': 1	PS50011': 1	-	-	-	SSF56112': 1	-	-	-
ETK94767.1		-	-	-	-	-	-	-	G3DSA:1.10.510.10': 1	-	Protein kinase-like domain': 1	IPR011009': 1	-	-	PTHR23139:SF77': 1, 'PTHR23139': 1	-	-	-	-	-	-	-	-	-	SSF56112': 1	-	-	-
ETK95364.1
ETK95410.1
ETK95411.1		-	-	-	-	NK': 1	cd02019': 1	-	G3DSA:3.40.50.300': 1	-	P-loop containing nucleoside triphosphate hydrolase': 1	IPR027417': 1	-	-	-	-	-	-	-	-	-	-	-	-	SSF52540': 1	-	-	-
ETK95683.1
ETK95905.1
ETK80602.1		-	-	Region of a membrane-bound protein predicted to be outside the membrane, in the extracellular region.': 2, 'Region of a membrane-bound protein predicted to be embedded in the membrane.': 2, 'Region of a membrane-bound protein predicted to be outside the membrane, in the cytoplasm.': 1	TRANSMEMBRANE': 2, 'NON_CYTOPLASMIC_DOMAIN': 2, 'CYTOPLASMIC_DOMAIN': 1	-	-	-	G3DSA:3.30.420.10': 1	GO:0003676': 1	Ribonuclease H-like domain': 1	IPR012337': 1	-	-	PTHR33129': 1	-	-	-	-	-	-	-	-	-	-	-	-	TMhelix': 1
ETK85046.1		-	-	Region of a membrane-bound protein predicted to be outside the membrane, in the extracellular region.': 1, 'Region of a membrane-bound protein predicted to be embedded in the membrane.': 1, 'Region of a membrane-bound protein predicted to be outside the membrane, in the cytoplasm.': 1	CYTOPLASMIC_DOMAIN': 1, 'NON_CYTOPLASMIC_DOMAIN': 1, 'TRANSMEMBRANE': 1	-	-	Coil': 1	-	-	-	-	-	-	PTHR33129': 1	-	-	-	-	-	-	-	-	-	-	-	-	TMhelix': 1
ETK85810.1		-	-	Region of a membrane-bound protein predicted to be outside the membrane, in the extracellular region.': 1, 'Region of a membrane-bound protein predicted to be embedded in the membrane.': 1, 'Region of a membrane-bound protein predicted to be outside the membrane, in the cytoplasm.': 1	NON_CYTOPLASMIC_DOMAIN': 1, 'TRANSMEMBRANE': 1, 'CYTOPLASMIC_DOMAIN': 1	-	-	-	G3DSA:1.10.510.10': 1, 'G3DSA:3.30.200.20': 1	GO:0004672|GO:0005524|GO:0006468': 3, 'GO:0004672|GO:0006468': 1	Protein kinase domain': 3, 'Serine/threonine-protein kinase, active site': 1, 'Protein kinase-like domain': 1, 'Calcium/calmodulin-dependent/calcium-dependent protein kinase': 1	IPR000719': 3, 'IPR011009': 1, 'IPR008271': 1, 'IPR020636': 1	-	-	PTHR24347': 1, 'PTHR24347:SF300': 1	Protein kinase domain': 1	PF00069': 1	Serine/Threonine protein kinases active-site signature.': 1	PS00108': 1	Protein kinase domain profile.': 1	PS50011': 1	-	-	SM00220': 1	SSF56112': 1	-	-	-
ETK90343.1		-	-	Region of a membrane-bound protein predicted to be outside the membrane, in the extracellular region.': 1, 'Region of a membrane-bound protein predicted to be embedded in the membrane.': 1, 'Region of a membrane-bound protein predicted to be outside the membrane, in the cytoplasm.': 1	TRANSMEMBRANE': 1, 'NON_CYTOPLASMIC_DOMAIN': 1, 'CYTOPLASMIC_DOMAIN': 1	-	-	-	-	-	-	-	-	-	-	-	-	-	-	-	-	-	-	-	-	-	-	-
ETK91611.1		-	-	Region of a membrane-bound protein predicted to be outside the membrane, in the extracellular region.': 1, 'Region of a membrane-bound protein predicted to be embedded in the membrane.': 1, 'Region of a membrane-bound protein predicted to be outside the membrane, in the cytoplasm.': 1	NON_CYTOPLASMIC_DOMAIN': 1, 'CYTOPLASMIC_DOMAIN': 1, 'TRANSMEMBRANE': 1	-	-	-	G3DSA:3.40.50.300': 1	-	-	-	-	-	PTHR33129': 1	-	-	-	-	-	-	-	-	-	-	-	-	TMhelix': 1

## Sheet: CJ05E6_candidate Cinkler
Protein	LXLFLAK Domain	SignalP_EUK_Description	SignalP_GRAM_POSITIVE_Description	Phobius_Description	Phobius_ID	CDD_Description	CDD_ID	Coils	Gene3D	GO_terms	IPR_Description	IPR_ID	MobiDBLite_Description	MobiDBLite_ID	PANTHER_Description	Pfam_Description	Pfam_ID	ProSitePatterns_Description	ProSitePatterns_ID	ProSiteProfiles_Description	ProSiteProfiles_ID	SFLD_Description	SFLD_ID	SMART	SUPERFAMILY	TIGRFAM_Description	TIGRFAM_ID	TMHMM
ETL25761.1	LKLYLAK	SignalP-noTM': 1	-	Signal peptide region': 1, 'N-terminal region of a signal peptide.': 1, 'Hydrophobic region of a signal peptide.': 1, 'Region of a membrane-bound protein predicted to be outside the membrane, in the extracellular region.': 1, 'C-terminal region of a signal peptide.': 1	SIGNAL_PEPTIDE': 1, 'NON_CYTOPLASMIC_DOMAIN': 1, 'SIGNAL_PEPTIDE_H_REGION': 1, 'SIGNAL_PEPTIDE_C_REGION': 1, 'SIGNAL_PEPTIDE_N_REGION': 1	-	-	-	-	-	-	-	-	-	-	-	-	-	-	-	-	-	-	-	-	-	-	-
ETL29171.1	MNLFLAK	SignalP-noTM': 1	-	N-terminal region of a signal peptide.': 1, 'Region of a membrane-bound protein predicted to be outside the membrane, in the extracellular region.': 1, 'Hydrophobic region of a signal peptide.': 1, 'Signal peptide region': 1, 'C-terminal region of a signal peptide.': 1	NON_CYTOPLASMIC_DOMAIN': 1, 'SIGNAL_PEPTIDE': 1, 'SIGNAL_PEPTIDE_N_REGION': 1, 'SIGNAL_PEPTIDE_C_REGION': 1, 'SIGNAL_PEPTIDE_H_REGION': 1	-	-	-	G3DSA:3.10.20.90': 1	-	-	-	-	-	-	-	-	-	-	-	-	-	-	-	-	-	-	-
ETL25846.1	LQLFLAK	-	-	N-terminal region of a signal peptide.': 1, 'C-terminal region of a signal peptide.': 1, 'Region of a membrane-bound protein predicted to be outside the membrane, in the extracellular region.': 1, 'Signal peptide region': 1, 'Hydrophobic region of a signal peptide.': 1	NON_CYTOPLASMIC_DOMAIN': 1, 'SIGNAL_PEPTIDE': 1, 'SIGNAL_PEPTIDE_N_REGION': 1, 'SIGNAL_PEPTIDE_C_REGION': 1, 'SIGNAL_PEPTIDE_H_REGION': 1	-	-	-	-	-	-	-	-	-	PTHR33129': 1	-	-	-	-	-	-	-	-	-	-	-	-	-
ETL48169.1	LELFLAR	-	-	Hydrophobic region of a signal peptide.': 1, 'N-terminal region of a signal peptide.': 1, 'Region of a membrane-bound protein predicted to be outside the membrane, in the extracellular region.': 1, 'Signal peptide region': 1, 'C-terminal region of a signal peptide.': 1	NON_CYTOPLASMIC_DOMAIN': 1, 'SIGNAL_PEPTIDE': 1, 'SIGNAL_PEPTIDE_N_REGION': 1, 'SIGNAL_PEPTIDE_C_REGION': 1, 'SIGNAL_PEPTIDE_H_REGION': 1	-	-	Coil': 1	-	-	-	-	-	-	-	-	-	-	-	-	-	-	-	-	-	-	-	-
ETL36642.1	LRLFLAR	SignalP-noTM': 1	-	Hydrophobic region of a signal peptide.': 1, 'N-terminal region of a signal peptide.': 1, 'Signal peptide region': 1, 'Region of a membrane-bound protein predicted to be outside the membrane, in the extracellular region.': 1, 'C-terminal region of a signal peptide.': 1	NON_CYTOPLASMIC_DOMAIN': 1, 'SIGNAL_PEPTIDE': 1, 'SIGNAL_PEPTIDE_H_REGION': 1, 'SIGNAL_PEPTIDE_C_REGION': 1, 'SIGNAL_PEPTIDE_N_REGION': 1	-	-	Coil': 1	G3DSA:3.10.20.90': 1	-	-	-	consensus disorder prediction': 1	mobidb-lite': 1	-	-	-	-	-	-	-	-	-	-	-	-	-	-
ETL42052.1	LSLFLAK	-	-	N-terminal region of a signal peptide.': 1, 'Region of a membrane-bound protein predicted to be outside the membrane, in the extracellular region.': 1, 'Hydrophobic region of a signal peptide.': 1, 'Signal peptide region': 1, 'C-terminal region of a signal peptide.': 1	NON_CYTOPLASMIC_DOMAIN': 1, 'SIGNAL_PEPTIDE': 1, 'SIGNAL_PEPTIDE_N_REGION': 1, 'SIGNAL_PEPTIDE_C_REGION': 1, 'SIGNAL_PEPTIDE_H_REGION': 1	-	-	-	-	-	-	-	-	-	-	-	-	-	-	-	-	-	-	-	-	-	-	-
ETL32181.1		-	-	Hydrophobic region of a signal peptide.': 1, 'N-terminal region of a signal peptide.': 1, 'Signal peptide region': 1, 'Region of a membrane-bound protein predicted to be outside the membrane, in the extracellular region.': 1, 'C-terminal region of a signal peptide.': 1	NON_CYTOPLASMIC_DOMAIN': 1, 'SIGNAL_PEPTIDE': 1, 'SIGNAL_PEPTIDE_H_REGION': 1, 'SIGNAL_PEPTIDE_C_REGION': 1, 'SIGNAL_PEPTIDE_N_REGION': 1	-	-	-	-	-	-	-	-	-	-	-	-	-	-	-	-	-	-	-	-	-	-	-
ETL48797.1		-	SignalP-TM': 1	-	-	-	-	-	-	-	-	-	-	-	-	-	-	-	-	-	-	-	-	-	-	-	-	-
ETL32182.1	LDEFLAK	-	-	-	-	-	-	-	-	-	-	-	consensus disorder prediction': 1	mobidb-lite': 1	-	-	-	-	-	-	-	-	-	-	-	-	-	-
ETL48179.1	LELFLAR	-	-	-	-	AAA': 1	cd00009': 1	Coil': 1	G3DSA:3.40.50.300': 2	-	P-loop containing nucleoside triphosphate hydrolase': 1	IPR027417': 1	-	-	PTHR33129': 1	-	-	-	-	-	-	-	-	-	SSF52540': 1	-	-	-
ETL38188.1	LQLLLAK
ETL38302.1	LHLFLAK	-	-	-	-	-	-	-	-	-	-	-	consensus disorder prediction': 1	mobidb-lite': 1	-	-	-	-	-	-	-	-	-	-	-	-	-	-
ETL39957.1	LKLFLAV
ETL45748.1	LKLFLPK
ETL46305.1	LELFLAR
ETL46476.1	LRLFLTK
ETL47221.1	LELFLAR
ETL26026.1
ETL26027.1
ETL26725.1
ETL27190.1		-	-	-	-	-	-	-	-	-	Peptidase S1, PA clan': 2	IPR009003': 2	consensus disorder prediction': 1	mobidb-lite': 1	-	-	-	-	-	-	-	-	-	-	SSF50494': 2	-	-	-
ETL27350.1
ETL28632.1
ETL28800.1
ETL28912.1
ETL29206.1		-	-	-	-	-	-	-	G3DSA:1.10.150.320': 1	-	-	-	-	-	-	-	-	-	-	-	-	-	-	-	SSF81585': 1	-	-	-
ETL29212.1
ETL29778.1
ETL30262.1		-	-	-	-	-	-	-	G3DSA:3.40.50.300': 1	-	P-loop containing nucleoside triphosphate hydrolase': 1	IPR027417': 1	-	-	-	AAA-like domain': 1	PF14516': 1	-	-	-	-	-	-	-	SSF52540': 1	-	-	-
ETL30264.1		-	-	-	-	-	-	-	G3DSA:3.90.1200.10': 1	-	Aminoglycoside phosphotransferase': 1, 'Protein kinase-like domain': 1	IPR002575': 1, 'IPR011009': 1	-	-	-	Phosphotransferase enzyme family': 1	PF01636': 1	-	-	-	-	-	-	-	SSF56112': 1	-	-	-
ETL30652.1		-	-	-	-	-	-	Coil': 1	-	-	-	-	-	-	-	-	-	-	-	-	-	-	-	-	-	-	-	-
ETL30923.1
ETL32241.1
ETL32384.1
ETL33218.1
ETL33383.1
ETL33775.1
ETL33776.1
ETL33777.1
ETL34626.1		-	-	-	-	-	-	-	-	-	P-loop containing nucleoside triphosphate hydrolase': 1	IPR027417': 1	consensus disorder prediction': 1	mobidb-lite': 1	PTHR33129': 1	-	-	-	-	-	-	-	-	-	SSF52540': 1	-	-	-
ETL35968.1		-	-	-	-	AAA': 1	cd00009': 1	-	G3DSA:3.40.50.300': 1	-	P-loop containing nucleoside triphosphate hydrolase': 1	IPR027417': 1	-	-	PTHR33129': 1	-	-	-	-	-	-	-	-	-	SSF52540': 1	-	-	-
ETL36415.1
ETL36416.1
ETL36942.1
ETL38497.1
ETL38543.1
ETL39628.1		-	-	-	-	-	-	-	-	-	-	-	consensus disorder prediction': 1	mobidb-lite': 1	-	-	-	-	-	-	-	-	-	-	-	-	-	-
ETL39786.1
ETL40645.1
ETL40679.1
ETL41606.1
ETL41607.1
ETL41919.1
ETL42400.1
ETL43225.1		-	-	-	-	-	-	-	G3DSA:3.40.50.300': 1	-	-	-	-	-	-	-	-	-	-	-	-	-	-	-	-	-	-	-
ETL44934.1		-	-	-	-	-	-	-	G3DSA:3.40.50.300': 1	-	P-loop containing nucleoside triphosphate hydrolase': 1	IPR027417': 1	-	-	-	-	-	-	-	-	-	-	-	-	SSF52540': 1	-	-	-
ETL44935.1		-	-	-	-	-	-	-	-	-	-	-	consensus disorder prediction': 1	mobidb-lite': 1	-	-	-	-	-	-	-	-	-	-	-	-	-	-
ETL45223.1		-	-	-	-	-	-	-	-	-	Protein kinase-like domain': 1	IPR011009': 1	-	-	-	-	-	-	-	-	-	-	-	-	SSF56112': 1	-	-	-
ETL46352.1
ETL46353.1
ETL46355.1
ETL46400.1		-	-	-	-	-	-	-	-	-	-	-	consensus disorder prediction': 1	mobidb-lite': 1	-	-	-	-	-	-	-	-	-	-	-	-	-	-
ETL46477.1		-	-	-	-	-	-	-	-	-	-	-	-	-	PTHR33129': 1	-	-	-	-	-	-	-	-	-	-	-	-	-
ETL46858.1		-	-	-	-	-	-	-	G3DSA:3.40.50.300': 1	-	P-loop containing nucleoside triphosphate hydrolase': 2	IPR027417': 2	-	-	-	-	-	-	-	-	-	-	-	-	SSF52540': 2	-	-	-
ETL47273.1		-	-	-	-	-	-	-	-	-	-	-	consensus disorder prediction': 1	mobidb-lite': 1	-	-	-	-	-	-	-	-	-	-	-	-	-	-
ETL47472.1
ETL47473.1
ETL47474.1		SignalP-noTM': 1	SignalP-TM': 1	N-terminal region of a signal peptide.': 1, 'C-terminal region of a signal peptide.': 1, 'Region of a membrane-bound protein predicted to be outside the membrane, in the extracellular region.': 1, 'Signal peptide region': 1, 'Hydrophobic region of a signal peptide.': 1	NON_CYTOPLASMIC_DOMAIN': 1, 'SIGNAL_PEPTIDE': 1, 'SIGNAL_PEPTIDE_N_REGION': 1, 'SIGNAL_PEPTIDE_C_REGION': 1, 'SIGNAL_PEPTIDE_H_REGION': 1	-	-	-	G3DSA:3.10.20.90': 1	-	-	-	-	-	-	-	-	-	-	-	-	-	-	-	-	-	-	-
ETL47690.1		-	-	-	-	PKc': 1	cd00180': 1	-	G3DSA:1.10.510.10': 2	GO:0004672|GO:0005524|GO:0006468': 2	Protein kinase domain': 2, 'Protein kinase-like domain': 1	IPR000719': 2, 'IPR011009': 1	-	-	PTHR23139:SF93': 1, 'PTHR23139': 1	Protein kinase domain': 1	PF00069': 1	-	-	Protein kinase domain profile.': 1	PS50011': 1	-	-	-	SSF56112': 1	-	-	-
ETL48166.1		-	-	-	-	-	-	-	G3DSA:1.10.510.10': 1	-	Protein kinase-like domain': 1	IPR011009': 1	-	-	PTHR23139:SF77': 1, 'PTHR23139': 1	-	-	-	-	-	-	-	-	-	SSF56112': 1	-	-	-
ETL48745.1		-	-	Hydrophobic region of a signal peptide.': 1, 'N-terminal region of a signal peptide.': 1, 'Region of a membrane-bound protein predicted to be outside the membrane, in the extracellular region.': 1, 'Signal peptide region': 1, 'C-terminal region of a signal peptide.': 1	NON_CYTOPLASMIC_DOMAIN': 1, 'SIGNAL_PEPTIDE': 1, 'SIGNAL_PEPTIDE_N_REGION': 1, 'SIGNAL_PEPTIDE_C_REGION': 1, 'SIGNAL_PEPTIDE_H_REGION': 1	-	-	-	-	-	-	-	-	-	-	-	-	-	-	-	-	-	-	-	-	-	-	-
ETL48752.1
ETL48798.1		-	-	-	-	NK': 1	cd02019': 1	-	G3DSA:3.40.50.300': 1	-	P-loop containing nucleoside triphosphate hydrolase': 1	IPR027417': 1	-	-	-	-	-	-	-	-	-	-	-	-	SSF52540': 1	-	-	-
ETL49067.1
ETL49284.1		-	-	-	-	-	-	-	-	-	-	-	-	-	PTHR33129': 1	-	-	-	-	-	-	-	-	-	-	-	-	-
ETL38469.1	LRLFLAK	-	-	Region of a membrane-bound protein predicted to be embedded in the membrane.': 1, 'Region of a membrane-bound protein predicted to be outside the membrane, in the cytoplasm.': 1, 'Region of a membrane-bound protein predicted to be outside the membrane, in the extracellular region.': 1	CYTOPLASMIC_DOMAIN': 1, 'NON_CYTOPLASMIC_DOMAIN': 1, 'TRANSMEMBRANE': 1	-	-	Coil': 1	-	-	-	-	-	-	-	-	-	-	-	-	-	-	-	-	-	-	-	TMhelix': 1
ETL34025.1		-	-	Region of a membrane-bound protein predicted to be embedded in the membrane.': 2, 'Region of a membrane-bound protein predicted to be outside the membrane, in the extracellular region.': 2, 'Region of a membrane-bound protein predicted to be outside the membrane, in the cytoplasm.': 1	NON_CYTOPLASMIC_DOMAIN': 2, 'TRANSMEMBRANE': 2, 'CYTOPLASMIC_DOMAIN': 1	-	-	-	G3DSA:3.30.420.10': 1	GO:0003676': 1	Ribonuclease H-like domain': 1	IPR012337': 1	-	-	PTHR33129': 1	-	-	-	-	-	-	-	-	-	-	-	-	TMhelix': 1
ETL39238.1		-	-	Region of a membrane-bound protein predicted to be embedded in the membrane.': 1, 'Region of a membrane-bound protein predicted to be outside the membrane, in the cytoplasm.': 1, 'Region of a membrane-bound protein predicted to be outside the membrane, in the extracellular region.': 1	CYTOPLASMIC_DOMAIN': 1, 'NON_CYTOPLASMIC_DOMAIN': 1, 'TRANSMEMBRANE': 1	-	-	-	G3DSA:1.10.510.10': 1, 'G3DSA:3.30.200.20': 1	GO:0004672|GO:0005524|GO:0006468': 3, 'GO:0004672|GO:0006468': 1	Protein kinase domain': 3, 'Serine/threonine-protein kinase, active site': 1, 'Protein kinase-like domain': 1, 'Calcium/calmodulin-dependent/calcium-dependent protein kinase': 1	IPR000719': 3, 'IPR008271': 1, 'IPR020636': 1, 'IPR011009': 1	-	-	PTHR24347:SF300': 1, 'PTHR24347': 1	Protein kinase domain': 1	PF00069': 1	Serine/Threonine protein kinases active-site signature.': 1	PS00108': 1	Protein kinase domain profile.': 1	PS50011': 1	-	-	SM00220': 1	SSF56112': 1	-	-	-
ETL43754.1		-	-	Region of a membrane-bound protein predicted to be embedded in the membrane.': 1, 'Region of a membrane-bound protein predicted to be outside the membrane, in the cytoplasm.': 1, 'Region of a membrane-bound protein predicted to be outside the membrane, in the extracellular region.': 1	CYTOPLASMIC_DOMAIN': 1, 'NON_CYTOPLASMIC_DOMAIN': 1, 'TRANSMEMBRANE': 1	-	-	-	-	-	-	-	-	-	-	-	-	-	-	-	-	-	-	-	-	-	-	-
ETL45021.1		-	-	Region of a membrane-bound protein predicted to be embedded in the membrane.': 1, 'Region of a membrane-bound protein predicted to be outside the membrane, in the cytoplasm.': 1, 'Region of a membrane-bound protein predicted to be outside the membrane, in the extracellular region.': 1	CYTOPLASMIC_DOMAIN': 1, 'NON_CYTOPLASMIC_DOMAIN': 1, 'TRANSMEMBRANE': 1	-	-	-	G3DSA:3.40.50.300': 1	-	-	-	-	-	PTHR33129': 1	-	-	-	-	-	-	-	-	-	-	-	-	TMhelix': 1

## Sheet: INRA-310_candidate Cinkler
Protein	LXLFLAK Domain	SignalP_EUK_Description	SignalP_GRAM_POSITIVE_Description	Phobius_Description	Phobius_ID	CDD_Description	CDD_ID	Coils	Gene3D	GO_terms	IPR_Description	IPR_ID	MobiDBLite_Description	MobiDBLite_ID	PANTHER_Description	Pfam_Description	Pfam_ID	ProSitePatterns_Description	ProSitePatterns_ID	ProSiteProfiles_Description	ProSiteProfiles_ID	SFLD_Description	SFLD_ID	SMART	SUPERFAMILY	TIGRFAM_Description	TIGRFAM_ID	TMHMM
ETM99931.1	LKLFLAK	SignalP-noTM': 1	-	C-terminal region of a signal peptide.': 1, 'N-terminal region of a signal peptide.': 1, 'Signal peptide region': 1, 'Region of a membrane-bound protein predicted to be outside the membrane, in the extracellular region.': 1, 'Hydrophobic region of a signal peptide.': 1	NON_CYTOPLASMIC_DOMAIN': 1, 'SIGNAL_PEPTIDE': 1, 'SIGNAL_PEPTIDE_H_REGION': 1, 'SIGNAL_PEPTIDE_C_REGION': 1, 'SIGNAL_PEPTIDE_N_REGION': 1	-	-	-	G3DSA:3.10.20.90': 1	-	-	-	-	-	-	-	-	-	-	-	-	-	-	-	-	-	-	-
ETN01922.1	MNLFLAK	SignalP-noTM': 1	-	C-terminal region of a signal peptide.': 1, 'N-terminal region of a signal peptide.': 1, 'Signal peptide region': 1, 'Region of a membrane-bound protein predicted to be outside the membrane, in the extracellular region.': 1, 'Hydrophobic region of a signal peptide.': 1	NON_CYTOPLASMIC_DOMAIN': 1, 'SIGNAL_PEPTIDE': 1, 'SIGNAL_PEPTIDE_H_REGION': 1, 'SIGNAL_PEPTIDE_C_REGION': 1, 'SIGNAL_PEPTIDE_N_REGION': 1	-	-	-	G3DSA:3.10.20.90': 1	-	-	-	consensus disorder prediction': 2	mobidb-lite': 2	-	-	-	-	-	-	-	-	-	-	SSF54001': 1	-	-	-
ETN06607.1	LQLFLAK	SignalP-noTM': 1	-	C-terminal region of a signal peptide.': 1, 'N-terminal region of a signal peptide.': 1, 'Region of a membrane-bound protein predicted to be outside the membrane, in the extracellular region.': 1, 'Signal peptide region': 1, 'Hydrophobic region of a signal peptide.': 1	NON_CYTOPLASMIC_DOMAIN': 1, 'SIGNAL_PEPTIDE': 1, 'SIGNAL_PEPTIDE_H_REGION': 1, 'SIGNAL_PEPTIDE_C_REGION': 1, 'SIGNAL_PEPTIDE_N_REGION': 1	PKc': 1	cd00180': 1	-	G3DSA:1.10.510.10': 2	GO:0004672|GO:0005524|GO:0006468': 3	Protein kinase domain': 3, 'Protein kinase-like domain': 1	IPR000719': 3, 'IPR011009': 1	-	-	PTHR23139': 1, 'PTHR23139:SF93': 1	Protein kinase domain': 1	PF00069': 1	-	-	Protein kinase domain profile.': 1	PS50011': 1	-	-	SM00220': 1	SSF56112': 1	-	-	-
ETN09365.1	LQLFLAK	SignalP-noTM': 1	-	C-terminal region of a signal peptide.': 1, 'N-terminal region of a signal peptide.': 1, 'Region of a membrane-bound protein predicted to be outside the membrane, in the extracellular region.': 1, 'Signal peptide region': 1, 'Hydrophobic region of a signal peptide.': 1	NON_CYTOPLASMIC_DOMAIN': 1, 'SIGNAL_PEPTIDE': 1, 'SIGNAL_PEPTIDE_H_REGION': 1, 'SIGNAL_PEPTIDE_C_REGION': 1, 'SIGNAL_PEPTIDE_N_REGION': 1	-	-	-	G3DSA:3.10.20.90': 1	-	-	-	-	-	PTHR33129': 1	-	-	-	-	-	-	-	-	-	-	-	-	-
ETN10736.1	LSLFLAK	-	-	C-terminal region of a signal peptide.': 1, 'N-terminal region of a signal peptide.': 1, 'Signal peptide region': 1, 'Region of a membrane-bound protein predicted to be outside the membrane, in the extracellular region.': 1, 'Hydrophobic region of a signal peptide.': 1	NON_CYTOPLASMIC_DOMAIN': 1, 'SIGNAL_PEPTIDE': 1, 'SIGNAL_PEPTIDE_H_REGION': 1, 'SIGNAL_PEPTIDE_C_REGION': 1, 'SIGNAL_PEPTIDE_N_REGION': 1	-	-	-	-	-	-	-	-	-	-	-	-	-	-	-	-	-	-	-	-	-	-	-
ETN00764.1	LQLYLAK	-	-	C-terminal region of a signal peptide.': 1, 'N-terminal region of a signal peptide.': 1, 'Signal peptide region': 1, 'Region of a membrane-bound protein predicted to be outside the membrane, in the extracellular region.': 1, 'Hydrophobic region of a signal peptide.': 1	NON_CYTOPLASMIC_DOMAIN': 1, 'SIGNAL_PEPTIDE': 1, 'SIGNAL_PEPTIDE_H_REGION': 1, 'SIGNAL_PEPTIDE_C_REGION': 1, 'SIGNAL_PEPTIDE_N_REGION': 1	-	-	-	-	-	Peptidase S1, PA clan': 2	IPR009003': 2	-	-	-	-	-	-	-	-	-	-	-	-	SSF50494': 2	-	-	-
ETN04195.1	LDLFLAR	-	-	C-terminal region of a signal peptide.': 1, 'N-terminal region of a signal peptide.': 1, 'Signal peptide region': 1, 'Region of a membrane-bound protein predicted to be outside the membrane, in the extracellular region.': 1, 'Hydrophobic region of a signal peptide.': 1	NON_CYTOPLASMIC_DOMAIN': 1, 'SIGNAL_PEPTIDE': 1, 'SIGNAL_PEPTIDE_H_REGION': 1, 'SIGNAL_PEPTIDE_C_REGION': 1, 'SIGNAL_PEPTIDE_N_REGION': 1	-	-	Coil': 1	-	-	-	-	-	-	-	-	-	-	-	-	-	-	-	-	-	-	-	-
ETN13963.1	LRLFLTK	-	-	C-terminal region of a signal peptide.': 1, 'N-terminal region of a signal peptide.': 1, 'Signal peptide region': 1, 'Region of a membrane-bound protein predicted to be outside the membrane, in the extracellular region.': 1, 'Hydrophobic region of a signal peptide.': 1	NON_CYTOPLASMIC_DOMAIN': 1, 'SIGNAL_PEPTIDE': 1, 'SIGNAL_PEPTIDE_H_REGION': 1, 'SIGNAL_PEPTIDE_C_REGION': 1, 'SIGNAL_PEPTIDE_N_REGION': 1	-	-	-	G3DSA:3.10.20.90': 1	-	-	-	-	-	PTHR33129': 1	-	-	-	-	-	-	-	-	-	-	-	-	-
ETN14072.1	LELFLAR	-	-	C-terminal region of a signal peptide.': 1, 'N-terminal region of a signal peptide.': 1, 'Signal peptide region': 1, 'Region of a membrane-bound protein predicted to be outside the membrane, in the extracellular region.': 1, 'Hydrophobic region of a signal peptide.': 1	NON_CYTOPLASMIC_DOMAIN': 1, 'SIGNAL_PEPTIDE': 1, 'SIGNAL_PEPTIDE_H_REGION': 1, 'SIGNAL_PEPTIDE_C_REGION': 1, 'SIGNAL_PEPTIDE_N_REGION': 1	-	-	-	G3DSA:1.10.510.10': 1, 'G3DSA:3.10.20.90': 1	-	Protein kinase-like domain': 1	IPR011009': 1	-	-	-	-	-	-	-	-	-	-	-	-	SSF56112': 1	-	-	-
ETN14902.1	LRLFLAK	-	-	C-terminal region of a signal peptide.': 1, 'N-terminal region of a signal peptide.': 1, 'Signal peptide region': 1, 'Region of a membrane-bound protein predicted to be outside the membrane, in the extracellular region.': 1, 'Hydrophobic region of a signal peptide.': 1	NON_CYTOPLASMIC_DOMAIN': 1, 'SIGNAL_PEPTIDE': 1, 'SIGNAL_PEPTIDE_H_REGION': 1, 'SIGNAL_PEPTIDE_C_REGION': 1, 'SIGNAL_PEPTIDE_N_REGION': 1	-	-	-	G3DSA:3.30.200.20': 1, 'G3DSA:3.90.1200.10': 1	GO:0005524': 1	Protein kinase, ATP binding site': 1, 'Protein kinase-like domain': 1	IPR017441': 1, 'IPR011009': 1	-	-	-	-	-	Protein kinases ATP-binding region signature.': 1	PS00107': 1	-	-	-	-	-	SSF56112': 1	-	-	-
ETN15663.1	LQLFLAK	-	-	C-terminal region of a signal peptide.': 1, 'N-terminal region of a signal peptide.': 1, 'Region of a membrane-bound protein predicted to be outside the membrane, in the extracellular region.': 1, 'Signal peptide region': 1, 'Hydrophobic region of a signal peptide.': 1	NON_CYTOPLASMIC_DOMAIN': 1, 'SIGNAL_PEPTIDE': 1, 'SIGNAL_PEPTIDE_H_REGION': 1, 'SIGNAL_PEPTIDE_C_REGION': 1, 'SIGNAL_PEPTIDE_N_REGION': 1	-	-	-	-	-	-	-	-	-	-	-	-	-	-	-	-	-	-	-	-	-	-	-
ETN14590.1		SignalP-noTM': 1	SignalP-TM': 1	C-terminal region of a signal peptide.': 1, 'N-terminal region of a signal peptide.': 1, 'Signal peptide region': 1, 'Region of a membrane-bound protein predicted to be outside the membrane, in the extracellular region.': 1, 'Hydrophobic region of a signal peptide.': 1	NON_CYTOPLASMIC_DOMAIN': 1, 'SIGNAL_PEPTIDE': 1, 'SIGNAL_PEPTIDE_H_REGION': 1, 'SIGNAL_PEPTIDE_C_REGION': 1, 'SIGNAL_PEPTIDE_N_REGION': 1	-	-	-	G3DSA:3.10.20.90': 1	-	-	-	-	-	-	-	-	-	-	-	-	-	-	-	-	-	-	-
ETN19498.1		-	-	C-terminal region of a signal peptide.': 1, 'N-terminal region of a signal peptide.': 1, 'Region of a membrane-bound protein predicted to be outside the membrane, in the extracellular region.': 1, 'Signal peptide region': 1, 'Hydrophobic region of a signal peptide.': 1	NON_CYTOPLASMIC_DOMAIN': 1, 'SIGNAL_PEPTIDE': 1, 'SIGNAL_PEPTIDE_H_REGION': 1, 'SIGNAL_PEPTIDE_C_REGION': 1, 'SIGNAL_PEPTIDE_N_REGION': 1	-	-	-	-	-	-	-	-	-	-	-	-	-	-	-	-	-	-	-	-	-	-	-
ETN06732.1		-	-	C-terminal region of a signal peptide.': 1, 'N-terminal region of a signal peptide.': 1, 'Region of a membrane-bound protein predicted to be outside the membrane, in the extracellular region.': 1, 'Signal peptide region': 1, 'Hydrophobic region of a signal peptide.': 1	NON_CYTOPLASMIC_DOMAIN': 1, 'SIGNAL_PEPTIDE': 1, 'SIGNAL_PEPTIDE_H_REGION': 1, 'SIGNAL_PEPTIDE_C_REGION': 1, 'SIGNAL_PEPTIDE_N_REGION': 1	-	-	-	-	-	-	-	-	-	-	-	-	-	-	-	-	-	-	-	-	-	-	-
ETN14908.1		-	SignalP-TM': 1	C-terminal region of a signal peptide.': 1, 'N-terminal region of a signal peptide.': 1, 'Region of a membrane-bound protein predicted to be outside the membrane, in the extracellular region.': 1, 'Signal peptide region': 1, 'Hydrophobic region of a signal peptide.': 1	NON_CYTOPLASMIC_DOMAIN': 1, 'SIGNAL_PEPTIDE': 1, 'SIGNAL_PEPTIDE_H_REGION': 1, 'SIGNAL_PEPTIDE_C_REGION': 1, 'SIGNAL_PEPTIDE_N_REGION': 1	AAA': 1	cd00009': 1	Coil': 1	G3DSA:3.40.50.300': 1	-	P-loop containing nucleoside triphosphate hydrolase': 1	IPR027417': 1	-	-	PTHR33129': 1	-	-	-	-	-	-	-	-	-	SSF52540': 1	-	-	-
ETM99842.1	LKLYLAK	-	-	-	-	-	-	-	-	-	-	-	consensus disorder prediction': 1	mobidb-lite': 1	-	-	-	-	-	-	-	-	-	-	-	-	-	-
ETN04124.1	LQLVLAK
ETN25071.1	MQLFLAK
ETN08711.1	LKLFLAV
ETN12615.1	LKLFLVK	-	-	-	-	-	-	Coil': 1	-	-	-	-	-	-	-	-	-	-	-	-	-	-	-	-	-	-	-	-
ETN13087.1	LELFLAR
ETN14042.1	LQLFLAK	-	-	-	-	-	-	-	-	-	-	-	-	-	PTHR33129': 1	-	-	-	-	-	-	-	-	-	-	-	-	-
ETN14045.1	LQPFLAK
ETN16714.1	LQLSLAK
ETN16715.1	LQLSLAK
ETN16716.1	LQLSLAK
ETN16717.1	LQLSLAK
ETN17325.1	LDEFLAK
ETN21728.1	LHLFLAK
ETM97220.1
ETM97624.1
ETM97746.1
ETM98678.1		-	-	-	-	PKc': 1	cd00180': 1	-	G3DSA:1.10.510.10': 2	GO:0004672|GO:0005524|GO:0006468': 2	Protein kinase domain': 2, 'Protein kinase-like domain': 1	IPR000719': 2, 'IPR011009': 1	-	-	PTHR23139': 1, 'PTHR23139:SF93': 1	Protein kinase domain': 1	PF00069': 1	-	-	Protein kinase domain profile.': 1	PS50011': 1	-	-	-	SSF56112': 1	-	-	-
ETM98697.1
ETM98752.1
ETN00023.1
ETN00159.1
ETN00160.1
ETN00689.1
ETN00774.1		-	-	-	-	-	-	-	-	-	Peptidase S1, PA clan': 2	IPR009003': 2	-	-	-	-	-	-	-	-	-	-	-	-	SSF50494': 2	-	-	-
ETN00989.1
ETN01303.1
ETN01534.1
ETN01873.1
ETN01877.1		-	-	-	-	-	-	-	-	-	-	-	-	-	-	-	-	-	-	-	-	-	-	-	SSF81585': 1	-	-	-
ETN01923.1
ETN02752.1
ETN04201.1		-	-	-	-	-	-	-	G3DSA:3.90.1200.10': 1	-	Aminoglycoside phosphotransferase': 1, 'Protein kinase-like domain': 1	IPR002575': 1, 'IPR011009': 1	-	-	-	Phosphotransferase enzyme family': 1	PF01636': 1	-	-	-	-	-	-	-	SSF56112': 1	-	-	-
ETN04234.1		-	-	-	-	-	-	Coil': 1	-	-	-	-	-	-	-	-	-	-	-	-	-	-	-	-	-	-	-	-
ETN04239.1
ETN04240.1
ETN04354.1
ETN04969.1		-	-	-	-	-	-	-	G3DSA:3.40.50.300': 1	-	P-loop containing nucleoside triphosphate hydrolase': 1	IPR027417': 1	-	-	-	AAA domain': 1	PF13604': 1	-	-	-	-	-	-	-	SSF52540': 1	-	-	-
ETN04970.1		-	-	-	-	-	-	-	G3DSA:3.40.50.300': 1	-	P-loop containing nucleoside triphosphate hydrolase': 1	IPR027417': 1	-	-	-	AAA domain': 1	PF13604': 1	-	-	-	-	-	-	-	SSF52540': 1	-	-	-
ETN04971.1		-	-	-	-	-	-	Coil': 1	G3DSA:3.40.50.300': 1	-	P-loop containing nucleoside triphosphate hydrolase': 1	IPR027417': 1	-	-	-	AAA domain': 1	PF13604': 1	-	-	-	-	-	-	-	SSF52540': 1	-	-	-
ETN06131.1		-	-	-	-	AAA': 1	cd00009': 1	-	G3DSA:3.40.50.300': 1	-	P-loop containing nucleoside triphosphate hydrolase': 1	IPR027417': 1	-	-	PTHR33129': 1	-	-	-	-	-	-	-	-	-	SSF52540': 1	-	-	-
ETN06731.1
ETN08491.1		-	-	-	-	-	-	-	-	-	-	-	consensus disorder prediction': 1	mobidb-lite': 1	-	-	-	-	-	-	-	-	-	-	-	-	-	-
ETN10590.1		-	-	-	-	PKc': 1	cd00180': 1	-	G3DSA:1.10.510.10': 2	GO:0004672|GO:0005524|GO:0006468': 2	Protein kinase domain': 2, 'Protein kinase-like domain': 1	IPR000719': 2, 'IPR011009': 1	-	-	PTHR23139': 1, 'PTHR23139:SF93': 1	Protein kinase domain': 1	PF00069': 1	-	-	Protein kinase domain profile.': 1	PS50011': 1	-	-	-	SSF56112': 1	-	-	-
ETN10865.1		-	-	-	-	-	-	-	G3DSA:3.90.1200.10': 1	GO:0004672|GO:0006468': 1	Tyrosine-protein kinase, active site': 1, 'Protein kinase-like domain': 1	IPR008266': 1, 'IPR011009': 1	-	-	-	-	-	Tyrosine protein kinases specific active-site signature.': 1	PS00109': 1	-	-	-	-	-	SSF56112': 1	-	-	-
ETN11008.1
ETN12335.1		-	-	-	-	-	-	-	-	-	-	-	consensus disorder prediction': 1	mobidb-lite': 1	-	-	-	-	-	-	-	-	-	-	-	-	-	-
ETN12432.1		-	-	-	-	-	-	-	G3DSA:3.40.50.300': 1	-	P-loop containing nucleoside triphosphate hydrolase': 1	IPR027417': 1	-	-	-	-	-	-	-	-	-	-	-	-	SSF52540': 1	-	-	-
ETN12433.1		-	-	-	-	-	-	-	-	-	-	-	consensus disorder prediction': 1	mobidb-lite': 1	-	-	-	-	-	-	-	-	-	-	-	-	-	-
ETN13004.1		-	-	-	-	ANK': 1	cd00204': 1	-	G3DSA:1.25.40.20': 2	-	Ankyrin repeat-containing domain': 3	IPR020683': 3	-	-	-	-	-	-	-	-	-	-	-	-	SSF48403': 1	-	-	-
ETN13046.1
ETN13111.1		-	-	-	-	-	-	-	G3DSA:3.40.50.980': 2, 'G3DSA:2.30.38.10': 1	GO:0003824|GO:0008152': 1, 'GO:0003987|GO:0016208|GO:0019427': 1	AMP-dependent synthetase/ligase': 1, 'Acetyl-coenzyme A synthetase, N-terminal domain': 1, 'Acetate-CoA ligase': 1, 'AMP-binding, conserved site': 1	IPR000873': 1, 'IPR011904': 1, 'IPR020845': 1, 'IPR032387': 1	-	-	PTHR24095': 1, 'PTHR24095:SF228': 1	AMP-binding enzyme': 1, 'Acetyl-coenzyme A synthetase N-terminus': 1	PF16177': 1, 'PF00501': 1	Putative AMP-binding domain signature.': 1	PS00455': 1	-	-	-	-	-	SSF56801': 1	Ac_CoA_lig_AcsA: acetate--CoA ligase': 1	TIGR02188': 1	-
ETN13598.1		-	-	-	-	-	-	-	G3DSA:3.40.50.300': 1	-	P-loop containing nucleoside triphosphate hydrolase': 2	IPR027417': 2	-	-	-	-	-	-	-	-	-	-	-	-	SSF52540': 2	-	-	-
ETN14043.1
ETN14589.1
ETN14898.1		-	-	-	-	-	-	-	G3DSA:3.30.200.20': 1, 'G3DSA:3.90.1200.10': 1	GO:0004672|GO:0005524|GO:0006468': 1, 'GO:0005524': 1	Protein kinase, ATP binding site': 1, 'Protein kinase-like domain': 1, 'Protein kinase domain': 1	IPR000719': 1, 'IPR017441': 1, 'IPR011009': 1	-	-	-	-	-	Protein kinases ATP-binding region signature.': 1	PS00107': 1	Protein kinase domain profile.': 1	PS50011': 1	-	-	-	SSF56112': 1	-	-	-
ETN14911.1		-	-	-	-	-	-	-	G3DSA:3.90.1200.10': 1, 'G3DSA:3.30.200.20': 1	GO:0005524': 1	Protein kinase, ATP binding site': 1, 'Protein kinase-like domain': 1	IPR017441': 1, 'IPR011009': 1	-	-	-	-	-	Protein kinases ATP-binding region signature.': 1	PS00107': 1	-	-	-	-	-	SSF56112': 1	-	-	-
ETN14924.1		-	-	-	-	-	-	-	G3DSA:1.10.510.10': 1	-	Protein kinase-like domain': 1	IPR011009': 1	-	-	PTHR23139': 1, 'PTHR23139:SF77': 1	-	-	-	-	-	-	-	-	-	SSF56112': 1	-	-	-
ETN15614.1
ETN15615.1		-	-	-	-	NK': 1	cd02019': 1	-	G3DSA:3.40.50.300': 1	-	P-loop containing nucleoside triphosphate hydrolase': 1	IPR027417': 1	-	-	-	-	-	-	-	-	-	-	-	-	SSF52540': 1	-	-	-
ETN16473.1		-	-	-	-	-	-	Coil': 1	-	-	-	-	-	-	-	-	-	-	-	-	-	-	-	-	-	-	-	-
ETN17326.1
ETN18043.1		-	-	-	-	-	-	-	G3DSA:3.90.1200.10': 1	-	Aminoglycoside phosphotransferase': 1, 'Protein kinase-like domain': 1	IPR002575': 1, 'IPR011009': 1	-	-	-	Phosphotransferase enzyme family': 1	PF01636': 1	-	-	-	-	-	-	-	SSF56112': 1	-	-	-
ETN18058.1		-	-	-	-	-	-	-	G3DSA:3.40.50.300': 1	-	P-loop containing nucleoside triphosphate hydrolase': 1	IPR027417': 1	consensus disorder prediction': 1	mobidb-lite': 1	-	AAA-like domain': 1	PF14516': 1	-	-	-	-	-	-	-	SSF52540': 1	-	-	-
ETN18540.1
ETN19278.1
ETN19432.1
ETN19499.1		-	-	-	-	-	-	Coil': 1	-	-	-	-	-	-	-	-	-	-	-	-	-	-	-	-	-	-	-	-
ETN20606.1		-	-	-	-	-	-	-	G3DSA:3.90.1200.10': 1	-	Protein kinase-like domain': 1	IPR011009': 1	-	-	PTHR33129': 1	-	-	-	-	-	-	-	-	-	SSF56112': 1	-	-	-
ETN20628.1
ETN21634.1
ETN24880.1		-	-	-	-	-	-	-	-	-	-	-	consensus disorder prediction': 1	mobidb-lite': 1	-	-	-	-	-	-	-	-	-	-	-	-	-	-
ETN24951.1		-	-	-	-	-	-	-	-	-	-	-	-	-	PTHR33129': 1	-	-	-	-	-	-	-	-	-	-	-	-	-
ETN21495.1	LQLFLAR	-	-	Region of a membrane-bound protein predicted to be outside the membrane, in the extracellular region.': 1, 'Region of a membrane-bound protein predicted to be embedded in the membrane.': 1, 'Region of a membrane-bound protein predicted to be outside the membrane, in the cytoplasm.': 1	NON_CYTOPLASMIC_DOMAIN': 1, 'CYTOPLASMIC_DOMAIN': 1, 'TRANSMEMBRANE': 1	-	-	-	-	-	-	-	-	-	-	-	-	-	-	-	-	-	-	-	-	-	-	TMhelix': 1
ETN23942.1	LRLFLAK	-	-	Region of a membrane-bound protein predicted to be embedded in the membrane.': 1, 'Region of a membrane-bound protein predicted to be outside the membrane, in the extracellular region.': 1, 'Region of a membrane-bound protein predicted to be outside the membrane, in the cytoplasm.': 1	NON_CYTOPLASMIC_DOMAIN': 1, 'CYTOPLASMIC_DOMAIN': 1, 'TRANSMEMBRANE': 1	-	-	-	-	-	HNH nuclease': 1	IPR003615': 1	-	-	-	HNH endonuclease': 1	PF13391': 1	-	-	-	-	-	-	-	-	-	-	-
ETN05158.1		-	-	Region of a membrane-bound protein predicted to be outside the membrane, in the extracellular region.': 2, 'Region of a membrane-bound protein predicted to be embedded in the membrane.': 2, 'Region of a membrane-bound protein predicted to be outside the membrane, in the cytoplasm.': 1	NON_CYTOPLASMIC_DOMAIN': 2, 'TRANSMEMBRANE': 2, 'CYTOPLASMIC_DOMAIN': 1	-	-	-	G3DSA:3.30.420.10': 1	GO:0003676': 1	Ribonuclease H-like domain': 1	IPR012337': 1	-	-	PTHR33129': 1	-	-	-	-	-	-	-	-	-	-	-	-	TMhelix': 1
ETN05542.1		-	-	Region of a membrane-bound protein predicted to be embedded in the membrane.': 1, 'Region of a membrane-bound protein predicted to be outside the membrane, in the extracellular region.': 1, 'Region of a membrane-bound protein predicted to be outside the membrane, in the cytoplasm.': 1	NON_CYTOPLASMIC_DOMAIN': 1, 'CYTOPLASMIC_DOMAIN': 1, 'TRANSMEMBRANE': 1	-	-	-	-	-	-	-	-	-	-	-	-	-	-	-	-	-	-	-	-	-	-	-
ETN12336.1		-	-	Region of a membrane-bound protein predicted to be outside the membrane, in the extracellular region.': 1, 'Region of a membrane-bound protein predicted to be outside the membrane, in the cytoplasm.': 1, 'Region of a membrane-bound protein predicted to be embedded in the membrane.': 1	NON_CYTOPLASMIC_DOMAIN': 1, 'TRANSMEMBRANE': 1, 'CYTOPLASMIC_DOMAIN': 1	-	-	-	G3DSA:3.40.50.300': 1	-	-	-	-	-	PTHR33129': 1	-	-	-	-	-	-	-	-	-	-	-	-	TMhelix': 1
ETN22122.1		-	-	Region of a membrane-bound protein predicted to be outside the membrane, in the extracellular region.': 1, 'Region of a membrane-bound protein predicted to be embedded in the membrane.': 1, 'Region of a membrane-bound protein predicted to be outside the membrane, in the cytoplasm.': 1	NON_CYTOPLASMIC_DOMAIN': 1, 'CYTOPLASMIC_DOMAIN': 1, 'TRANSMEMBRANE': 1	-	-	-	-	-	-	-	-	-	-	-	-	-	-	-	-	-	-	-	-	-	-	-
ETN20831.1		-	-	Region of a membrane-bound protein predicted to be outside the membrane, in the extracellular region.': 1, 'Region of a membrane-bound protein predicted to be embedded in the membrane.': 1, 'Region of a membrane-bound protein predicted to be outside the membrane, in the cytoplasm.': 1	NON_CYTOPLASMIC_DOMAIN': 1, 'CYTOPLASMIC_DOMAIN': 1, 'TRANSMEMBRANE': 1	-	-	-	G3DSA:1.10.510.10': 1, 'G3DSA:3.30.200.20': 1	GO:0004672|GO:0005524|GO:0006468': 3, 'GO:0004672|GO:0006468': 1	Protein kinase domain': 3, 'Serine/threonine-protein kinase, active site': 1, 'Calcium/calmodulin-dependent/calcium-dependent protein kinase': 1, 'Protein kinase-like domain': 1	IPR000719': 3, 'IPR020636': 1, 'IPR008271': 1, 'IPR011009': 1	-	-	PTHR24347:SF300': 1, 'PTHR24347': 1	Protein kinase domain': 1	PF00069': 1	Serine/Threonine protein kinases active-site signature.': 1	PS00108': 1	Protein kinase domain profile.': 1	PS50011': 1	-	-	SM00220': 1	SSF56112': 1	-	-	-
ETN21570.1		-	-	Region of a membrane-bound protein predicted to be outside the membrane, in the extracellular region.': 1, 'Region of a membrane-bound protein predicted to be embedded in the membrane.': 1, 'Region of a membrane-bound protein predicted to be outside the membrane, in the cytoplasm.': 1	NON_CYTOPLASMIC_DOMAIN': 1, 'CYTOPLASMIC_DOMAIN': 1, 'TRANSMEMBRANE': 1	-	-	-	-	-	-	-	-	-	-	-	-	-	-	-	-	-	-	-	-	-	-	TMhelix': 1

[truncated: 3 more sheets: P10297_candidate Cinkler, P1569_candidate Cinkler, P1976_candidate Cinkler]
